# Supplementary material for: Characteristic Male Urine Microbiomes Associate with Asymptomatic Sexually Transmitted Infection
Source: PLoS One. 2010 Nov 24;5(11):e14116. doi: 10.1371/journal.pone.0014116 (PMC2991352; doi:10.1371/journal.pone.0014116)
Supplement: Table S5 — Complete list of urine taxa by RDP best match. (0.48 MB XLS) [file pone.0014116.s005.xls]

## Sheet: blout.parse.txt
Query	RDP match	RDP description	BLAST score	BLAST e-value
a06d04	S000527990	Streptococcus anginosus; ChDC YA12; AY986764	2684	0
a06d05	S001572576	Enterococcus faecalis; KT2L24; AB481105	2476	0
a06d06	S000527990	Streptococcus anginosus; ChDC YA12; AY986764	1665	0
a06d07	S001418339	Haemophilus parainfluenzae; PN100; FJ939584	2593	0
a06d08	S000750307	Prevotella timonensis (T); 4401737; DQ518919	2583	0
a06d09	S000527990	Streptococcus anginosus; ChDC YA12; AY986764	2746	0
a06d10	S000750307	Prevotella timonensis (T); 4401737; DQ518919	2696	0
a06d11	S000527990	Streptococcus anginosus; ChDC YA12; AY986764	2708	0
a06e02	S001016338	Ochrobactrum sp. PED4-7; EU529846	2518	0
a06e03	S001418339	Haemophilus parainfluenzae; PN100; FJ939584	2278	0
a06e06	S000484011	Cytophaga sp. An36; AJ551174	2474	0
a06e07	S000527990	Streptococcus anginosus; ChDC YA12; AY986764	2617	0
a06e08	S001418339	Haemophilus parainfluenzae; PN100; FJ939584	2672	0
a06e10	S000527990	Streptococcus anginosus; ChDC YA12; AY986764	2587	0
a06f01	S000527990	Streptococcus anginosus; ChDC YA12; AY986764	2337	0
a06f02	S001169290	Haemophilus sp. 27p25; EU909643	2684	0
a06f03	S000527990	Streptococcus anginosus; ChDC YA12; AY986764	2724	0
a06f04	S001418339	Haemophilus parainfluenzae; PN100; FJ939584	2640	0
a06f06	S000527990	Streptococcus anginosus; ChDC YA12; AY986764	2746	0
a06f08	S001418339	Haemophilus parainfluenzae; PN100; FJ939584	2674	0
a06f09	S000527990	Streptococcus anginosus; ChDC YA12; AY986764	2531	0
a06f10	S000527990	Streptococcus anginosus; ChDC YA12; AY986764	2516	0
a06f12	S000006425	Facklamia hominis (T); ATCC 700628 type strain; Y10772	2460	0
a06g01	S000527990	Streptococcus anginosus; ChDC YA12; AY986764	2753	0
a06g03	S001873122	Haemophilus parainfluenzae; B160041; FJ685628	1493	0
a06g04	S001418339	Haemophilus parainfluenzae; PN100; FJ939584	2264	0
a06g06	S001418339	Haemophilus parainfluenzae; PN100; FJ939584	2545	0
a06g08	S000386901	Streptococcus mitis (T); ATCC 49456; AF003929	2712	0
a06g11	S000527990	Streptococcus anginosus; ChDC YA12; AY986764	2383	0
a06g12	S000000018	Actinomyces turicensis (T); APL10; X78720	2640	0
a06h01	S000527990	Streptococcus anginosus; ChDC YA12; AY986764	2448	0
a06h02	S000006425	Facklamia hominis (T); ATCC 700628 type strain; Y10772	2581	0
a06h03	S001546228	uncultured Streptococcus sp.; VE21X1B12; GQ179685	2379	0
a06h04	S001418339	Haemophilus parainfluenzae; PN100; FJ939584	2444	0
a06h05	S001546228	uncultured Streptococcus sp.; VE21X1B12; GQ179685	2504	0
a06h06	S000527990	Streptococcus anginosus; ChDC YA12; AY986764	2724	0
a06h07	S000527990	Streptococcus anginosus; ChDC YA12; AY986764	2583	0
a06h09	S000386901	Streptococcus mitis (T); ATCC 49456; AF003929	2450	0
a07a06	S000527990	Streptococcus anginosus; ChDC YA12; AY986764	2553	0
a07a08	S001290680	uncultured candidate division TM7 bacterium; 18; FJ629383	1931	0
a07a09	S001418339	Haemophilus parainfluenzae; PN100; FJ939584	2613	0
a07b01	S000527990	Streptococcus anginosus; ChDC YA12; AY986764	2682	0
a07b02	S000527990	Streptococcus anginosus; ChDC YA12; AY986764	2706	0
a07b05	S000366404	Corynebacterium pseudogenitalium; CIP106714, (ATCC33035),	2458	0
a07b06	S001169290	Haemophilus sp. 27p25; EU909643	2684	0
a07b08	S001418339	Haemophilus parainfluenzae; PN100; FJ939584	2543	0
a07b09	S000750307	Prevotella timonensis (T); 4401737; DQ518919	2339	0
a07b11	S000006425	Facklamia hominis (T); ATCC 700628 type strain; Y10772	2553	0
a07c01	S001418339	Haemophilus parainfluenzae; PN100; FJ939584	2561	0
a07c02	S000415358	Staphylococcus sp. H292; AB177642	2744	0
a07c03	S001418339	Haemophilus parainfluenzae; PN100; FJ939584	2660	0
a07c04	S001418339	Haemophilus parainfluenzae; PN100; FJ939584	2506	0
a07c05	S001418339	Haemophilus parainfluenzae; PN100; FJ939584	2640	0
a07c07	S000415358	Staphylococcus sp. H292; AB177642	2371	0
a07c08	S001873122	Haemophilus parainfluenzae; B160041; FJ685628	1524	0
a07c09	S000527990	Streptococcus anginosus; ChDC YA12; AY986764	2706	0
a07c10	S000750307	Prevotella timonensis (T); 4401737; DQ518919	2650	0
a07c11	S001418339	Haemophilus parainfluenzae; PN100; FJ939584	2323	0
a07c12	S000006425	Facklamia hominis (T); ATCC 700628 type strain; Y10772	2292	0
a07d01	S001418339	Haemophilus parainfluenzae; PN100; FJ939584	2442	0
a07d02	S001418339	Haemophilus parainfluenzae; PN100; FJ939584	2688	0
a07d03	S001418339	Haemophilus parainfluenzae; PN100; FJ939584	2680	0
a07d04	S001418339	Haemophilus parainfluenzae; PN100; FJ939584	2644	0
a07d05	S000527990	Streptococcus anginosus; ChDC YA12; AY986764	2738	0
a07d07	S001546232	uncultured Dialister sp.; VE58E12; GQ179689	2571	0
a07d08	S000527990	Streptococcus anginosus; ChDC YA12; AY986764	2682	0
a07d09	S001587966	Atopobium parvulum DSM 20469; CP001721	2032	0
a07d10	S000744818	uncultured beta proteobacterium; XME18; EF061949	2462	0
a07d12	S000006425	Facklamia hominis (T); ATCC 700628 type strain; Y10772	2355	0
a07e02	S001546223	uncultured Anaerococcus sp.; VE27D09; GQ179680	2246	0
a07e04	S000527990	Streptococcus anginosus; ChDC YA12; AY986764	2746	0
a07e05	S001792989	Propionibacterium acnes; JCM 6425; AB538431	2583	0
a07e06	S000527990	Streptococcus anginosus; ChDC YA12; AY986764	2294	0
a07e07	S001418339	Haemophilus parainfluenzae; PN100; FJ939584	2559	0
a07e08	S000944610	uncultured Haemophilus sp.; 402E01(oral); AM420172	2448	0
a07e10	S000260845	Corynebacterium pseudogenitalium; NCTC 11860; X81872	2621	0
a07e11	S000527990	Streptococcus anginosus; ChDC YA12; AY986764	2508	0
a07e12	S000965282	Delftia acidovorans SPH-1; CP000884	2399	0
a07f01	S000006425	Facklamia hominis (T); ATCC 700628 type strain; Y10772	1572	0
a07f02	S001418339	Haemophilus parainfluenzae; PN100; FJ939584	2672	0
a07f03	S000527990	Streptococcus anginosus; ChDC YA12; AY986764	2730	0
a07f06	S001418339	Haemophilus parainfluenzae; PN100; FJ939584	2516	0
a07f09	S000527990	Streptococcus anginosus; ChDC YA12; AY986764	2738	0
a07f11	S000404362	Peptoniphilus sp. 2002-2300004; AY244779	2508	0
a07g01	S000006425	Facklamia hominis (T); ATCC 700628 type strain; Y10772	2656	0
a07g02	S001418339	Haemophilus parainfluenzae; PN100; FJ939584	2535	0
a07g04	S001546228	uncultured Streptococcus sp.; VE21X1B12; GQ179685	2524	0
a07g06	S000944610	uncultured Haemophilus sp.; 402E01(oral); AM420172	2706	0
a07g07	S000527990	Streptococcus anginosus; ChDC YA12; AY986764	2748	0
a07g08	S001418339	Haemophilus parainfluenzae; PN100; FJ939584	2625	0
a07g10	S001418339	Haemophilus parainfluenzae; PN100; FJ939584	2529	0
a07g11	S000527990	Streptococcus anginosus; ChDC YA12; AY986764	2722	0
a07g12	S000000018	Actinomyces turicensis (T); APL10; X78720	2658	0
a07h01	S000386901	Streptococcus mitis (T); ATCC 49456; AF003929	2694	0
a07h02	S000386901	Streptococcus mitis (T); ATCC 49456; AF003929	2607	0
a07h03	S001418339	Haemophilus parainfluenzae; PN100; FJ939584	2629	0
a07h04	S001418339	Haemophilus parainfluenzae; PN100; FJ939584	2623	0
a07h05	S001418339	Haemophilus parainfluenzae; PN100; FJ939584	2615	0
a07h07	S001418339	Haemophilus parainfluenzae; PN100; FJ939584	2637	0
a07h09	S001546228	uncultured Streptococcus sp.; VE21X1B12; GQ179685	2456	0
a07h10	S001546223	uncultured Anaerococcus sp.; VE27D09; GQ179680	2591	0
a07h11	S001589410	Anaerococcus tetradius; F0127; GQ422749	2609	0
a08a02	S000527990	Streptococcus anginosus; ChDC YA12; AY986764	2664	0
a08a04	S001418339	Haemophilus parainfluenzae; PN100; FJ939584	2583	0
a08a06	S000750307	Prevotella timonensis (T); 4401737; DQ518919	2537	0
a08b02	S001418339	Haemophilus parainfluenzae; PN100; FJ939584	2696	0
a08b03	S001589410	Anaerococcus tetradius; F0127; GQ422749	2656	0
a08b04	S000527990	Streptococcus anginosus; ChDC YA12; AY986764	2698	0
a08b05	S001075525	uncultured Sutterella sp.; M4-27; EU530315	2280	0
a08b07	S000006425	Facklamia hominis (T); ATCC 700628 type strain; Y10772	2585	0
a08b08	S001587966	Atopobium parvulum DSM 20469; CP001721	1966	0
a08b09	S000527990	Streptococcus anginosus; ChDC YA12; AY986764	2730	0
a08c01	S001418339	Haemophilus parainfluenzae; PN100; FJ939584	2302	0
a08c02	S001587966	Atopobium parvulum DSM 20469; CP001721	2048	0
a08c03	S000083753	Corynebacterium coyleae (T); type strain: DSM 44184 = CCUG	2526	0
a08c04	S001418339	Haemophilus parainfluenzae; PN100; FJ939584	2658	0
a08c05	S000527990	Streptococcus anginosus; ChDC YA12; AY986764	2746	0
a08c08	S000527990	Streptococcus anginosus; ChDC YA12; AY986764	2684	0
a08c10	S000527990	Streptococcus anginosus; ChDC YA12; AY986764	2383	0
a08d03	S000527990	Streptococcus anginosus; ChDC YA12; AY986764	2722	0
a08d06	S000527990	Streptococcus anginosus; ChDC YA12; AY986764	2714	0
a08d07	S000527990	Streptococcus anginosus; ChDC YA12; AY986764	2724	0
a08d10	S001546223	uncultured Anaerococcus sp.; VE27D09; GQ179680	2621	0
a08e01	S000006425	Facklamia hominis (T); ATCC 700628 type strain; Y10772	2272	0
a08e05	S000386901	Streptococcus mitis (T); ATCC 49456; AF003929	2623	0
a08e06	S001418339	Haemophilus parainfluenzae; PN100; FJ939584	2478	0
a08e08	S000527990	Streptococcus anginosus; ChDC YA12; AY986764	2468	0
a08e11	S000527990	Streptococcus anginosus; ChDC YA12; AY986764	2682	0
a08e12	S000386901	Streptococcus mitis (T); ATCC 49456; AF003929	2474	0
a08f01	S001016338	Ochrobactrum sp. PED4-7; EU529846	2486	0
a08f02	S000527990	Streptococcus anginosus; ChDC YA12; AY986764	2541	0
a08f03	S001418339	Haemophilus parainfluenzae; PN100; FJ939584	2555	0
a08f04	S000527990	Streptococcus anginosus; ChDC YA12; AY986764	2603	0
a08f07	S000944634	uncultured Neisseria sp.; 502G08(oral); AM420196	1540	0
a08f08	S000415358	Staphylococcus sp. H292; AB177642	2738	0
a08f09	S000260845	Corynebacterium pseudogenitalium; NCTC 11860; X81872	2565	0
a08f12	S001241314	Stenotrophomonas maltophilia; SPd; FJ405363	2658	0
a08g01	S000527990	Streptococcus anginosus; ChDC YA12; AY986764	2714	0
a08g02	S000701766	Chryseobacterium sp. CI06; DQ530068	2157	0
a08g03	S000527990	Streptococcus anginosus; ChDC YA12; AY986764	2323	0
a08g05	S000516011	Porphyromonas somerae (T); WAL 6690; AY968205	2599	0
a08g06	S001169290	Haemophilus sp. 27p25; EU909643	2470	0
a08g07	S000750307	Prevotella timonensis (T); 4401737; DQ518919	2605	0
a08g08	S000527990	Streptococcus anginosus; ChDC YA12; AY986764	2527	0
a08g10	S000965282	Delftia acidovorans SPH-1; CP000884	2494	0
a08g11	S000386901	Streptococcus mitis (T); ATCC 49456; AF003929	2678	0
a08h02	S000386901	Streptococcus mitis (T); ATCC 49456; AF003929	2615	0
a08h03	S000527990	Streptococcus anginosus; ChDC YA12; AY986764	2373	0
a08h04	S001418339	Haemophilus parainfluenzae; PN100; FJ939584	2585	0
a08h06	S000386901	Streptococcus mitis (T); ATCC 49456; AF003929	2692	0
a08h07	S000000018	Actinomyces turicensis (T); APL10; X78720	2561	0
a08h08	S000386901	Streptococcus mitis (T); ATCC 49456; AF003929	2635	0
a08h09	S000527990	Streptococcus anginosus; ChDC YA12; AY986764	2656	0
a08h10	S000744818	uncultured beta proteobacterium; XME18; EF061949	2702	0
a08h11	S001418339	Haemophilus parainfluenzae; PN100; FJ939584	2680	0
a63e01	S000420542	Corynebacterium aurimucosum; NRRL B-24143; H2456; AY536427	2615	0
a61a04	S001796257	Corynebacterium sp. NML99-0020; GU304643	2470	0
a61a07	S000420542	Corynebacterium aurimucosum; NRRL B-24143; H2456; AY536427	2331	0
a61a08	S000435836	Corynebacterium sp.; SC8; D83375	2545	0
a61a09	S000128467	Corynebacterium tuberculostearicum (T); CIP107291;	2305	0
a61a10	S001198137	Streptococcus agalactiae 2603V/R; AE009948	2549	0
a61a11	S001418802	Staphylococcus haemolyticus; ES-13a2; FN393797	1816	0
a61b01	S000420542	Corynebacterium aurimucosum; NRRL B-24143; H2456; AY536427	2591	0
a61b02	S000721364	Corynebacterium aurimucosum; AE1-3; AB269764	2585	0
a61b03	S000441473	uncultured Corynebacterium sp.; ACTINO9A; AY494653	1596	0
a61b05	S000721364	Corynebacterium aurimucosum; AE1-3; AB269764	2545	0
a61b06	S000586768	uncultured Anaerococcus sp.; BL36; DQ130021	2123	0
a61b08	S000435836	Corynebacterium sp.; SC8; D83375	2369	0
a61b09	S000420542	Corynebacterium aurimucosum; NRRL B-24143; H2456; AY536427	2583	0
a61b10	S001793863	Aeromonas salmonicida subsp. salmonicida; CIP 57.50;	2575	0
a61c03	S000128467	Corynebacterium tuberculostearicum (T); CIP107291;	2609	0
a61c04	S000571641	Staphylococcus haemolyticus JCSC1435; AP006716	2730	0
a61c05	S000128467	Corynebacterium tuberculostearicum (T); CIP107291;	2688	0
a61c06	S000337826	uncultured Corynebacterium sp. MTcory16R; AF115941	2498	0
a61c07	S000366404	Corynebacterium pseudogenitalium; CIP106714, (ATCC33035),	2696	0
a61c08	S000571643	Staphylococcus haemolyticus JCSC1435; AP006716	2595	0
a61c09	S000653747	Staphylococcus sp. CNJ924 PL04; DQ448767	2706	0
a61c10	S000366404	Corynebacterium pseudogenitalium; CIP106714, (ATCC33035),	2591	0
a61c11	S001095808	Staphylococcus sp. TPL10; EU373380	2740	0
a61c12	S000005846	Corynebacterium minutissimum; NCTC 10288T; X82064	2413	0
a61d01	S000128467	Corynebacterium tuberculostearicum (T); CIP107291;	2666	0
a61d02	S001098775	Pseudomonas sp. me-11; EU652062	2728	0
a61d03	S000337826	uncultured Corynebacterium sp. MTcory16R; AF115941	2468	0
a61d04	S000128467	Corynebacterium tuberculostearicum (T); CIP107291;	2654	0
a61d05	S001418802	Staphylococcus haemolyticus; ES-13a2; FN393797	2482	0
a61d06	S000976868	uncultured Facklamia sp.; AV_8R-S-A01; EU341289	2635	0
a61d09	S000128467	Corynebacterium tuberculostearicum (T); CIP107291;	2480	0
a61d10	S000653747	Staphylococcus sp. CNJ924 PL04; DQ448767	2605	0
a61d11	S001449610	uncultured Staphylococcaceae bacterium; B14; FJ999596	2690	0
a61d12	S000434379	Corynebacterium striatum; RV5_00; AY008302	2321	0
a61e01	S000976868	uncultured Facklamia sp.; AV_8R-S-A01; EU341289	2601	0
a61e02	S000128467	Corynebacterium tuberculostearicum (T); CIP107291;	2704	0
a61e03	S000503804	Corynebacterium sp. 25850; AY581881	2605	0
a61e05	S000366404	Corynebacterium pseudogenitalium; CIP106714, (ATCC33035),	2492	0
a61e06	S000976868	uncultured Facklamia sp.; AV_8R-S-A01; EU341289	2639	0
a61e07	S000128467	Corynebacterium tuberculostearicum (T); CIP107291;	2587	0
a61e08	S000095332	Corynebacterium appendicis (T); DSM 44531T; IMMIB R-3491;	2438	0
a61e09	S000389740	Corynebacterium sp. 61720; AF234634	2204	0
a61e10	S001447882	uncultured Staphylococcus sp.; JPL-S3_I09; FJ957628	2753	0
a61f01	S000976868	uncultured Facklamia sp.; AV_8R-S-A01; EU341289	2670	0
a61f02	S000366404	Corynebacterium pseudogenitalium; CIP106714, (ATCC33035),	2704	0
a61f03	S000653747	Staphylococcus sp. CNJ924 PL04; DQ448767	2718	0
a61f05	S001447736	uncultured Staphylococcus sp.; JPL-1_O09; FJ957482	2633	0
a61f06	S000128467	Corynebacterium tuberculostearicum (T); CIP107291;	2678	0
a61f08	S000366404	Corynebacterium pseudogenitalium; CIP106714,	1762	0
a61f09	S000571641	Staphylococcus haemolyticus JCSC1435; AP006716	2678	0
a61f11	S000128467	Corynebacterium tuberculostearicum (T); CIP107291;	2518	0
a61g01	S000128467	Corynebacterium tuberculostearicum (T); CIP107291;	2696	0
a61g02	S000128467	Corynebacterium tuberculostearicum (T); CIP107291;	2704	0
a61g03	S000337826	uncultured Corynebacterium sp. MTcory16R; AF115941	2512	0
a61g04	S000420542	Corynebacterium aurimucosum; NRRL B-24143; H2456; AY536427	2510	0
a61g05	S000541310	Staphylococcus epidermidis RP62A; CP000029	2658	0
a61g06	S000571641	Staphylococcus haemolyticus JCSC1435; AP006716	2567	0
a61g07	S000128467	Corynebacterium tuberculostearicum (T); CIP107291;	2668	0
a61g08	S000420542	Corynebacterium aurimucosum; NRRL B-24143; H2456; AY536427	2577	0
a61g09	S000628247	Staphylococcus epidermidis ATCC 12228; AE015929	2688	0
a61g10	S000571643	Staphylococcus haemolyticus JCSC1435; AP006716	2752	0
a61g11	S001095808	Staphylococcus sp. TPL10; EU373380	2488	0
a61h01	S000571643	Staphylococcus haemolyticus JCSC1435; AP006716	2373	0
a61h02	S001447736	uncultured Staphylococcus sp.; JPL-1_O09; FJ957482	2714	0
a61h03	S000130866	Corynebacterium tuberculostearicum; CIP107067; AJ438051	2466	0
a61h04	S000128467	Corynebacterium tuberculostearicum (T); CIP107291;	2662	0
a61h05	S000420542	Corynebacterium aurimucosum; NRRL B-24143; H2456; AY536427	2567	0
a61h06	S000128467	Corynebacterium tuberculostearicum (T); CIP107291;	2712	0
a61h07	S001152293	Stenotrophomonas maltophilia R551-3; CP001111	2672	0
a61h08	S000130866	Corynebacterium tuberculostearicum; CIP107067; AJ438051	1875	0
a61h09	S000128467	Corynebacterium tuberculostearicum (T); CIP107291;	2617	0
a61h10	S000366404	Corynebacterium pseudogenitalium; CIP106714, (ATCC33035),	2416	0
a61h12	S000130232	Corynebacterium tuberculostearicum; CIP102346; AJ438045	2690	0
a62a05	S000653747	Staphylococcus sp. CNJ924 PL04; DQ448767	2637	0
a62a07	S001418802	Staphylococcus haemolyticus; ES-13a2; FN393797	2593	0
a62a10	S000571643	Staphylococcus haemolyticus JCSC1435; AP006716	2646	0
a62b03	S000366404	Corynebacterium pseudogenitalium; CIP106714, (ATCC33035),	2662	0
a62b04	S000571641	Staphylococcus haemolyticus JCSC1435; AP006716	2752	0
a62b05	S000366404	Corynebacterium pseudogenitalium; CIP106714, (ATCC33035),	2698	0
a62b06	S001796257	Corynebacterium sp. NML99-0020; GU304643	2359	0
a62b07	S000128467	Corynebacterium tuberculostearicum (T); CIP107291;	2688	0
a62b08	S000571641	Staphylococcus haemolyticus JCSC1435; AP006716	2736	0
a62b09	S000571641	Staphylococcus haemolyticus JCSC1435; AP006716	2752	0
a62b10	S000420542	Corynebacterium aurimucosum; NRRL B-24143; H2456; AY536427	2456	0
a62b11	S000366404	Corynebacterium pseudogenitalium; CIP106714, (ATCC33035),	2177	0
a62b12	S001447732	uncultured Staphylococcus sp.; JPL-1_M15; FJ957478	2482	0
a62c01	S000721364	Corynebacterium aurimucosum; AE1-3; AB269764	2553	0
a62c02	S000128467	Corynebacterium tuberculostearicum (T); CIP107291;	2696	0
a62c03	S000628247	Staphylococcus epidermidis ATCC 12228; AE015929	2752	0
a62c04	S000016131	Corynebacterium singulare (T); IBS B52218; CCUG 37330;	2397	0
a62c05	S000976868	uncultured Facklamia sp.; AV_8R-S-A01; EU341289	2694	0
a62c06	S001447736	uncultured Staphylococcus sp.; JPL-1_O09; FJ957482	2531	0
a62c07	S000571641	Staphylococcus haemolyticus JCSC1435; AP006716	2728	0
a62c08	S000128467	Corynebacterium tuberculostearicum (T); CIP107291;	2450	0
a62c09	S000544160	Staphylococcus hominis subsp. hominis; CV21; AJ717375	2730	0
a62c10	S000420542	Corynebacterium aurimucosum; NRRL B-24143; H2456; AY536427	2583	0
a62c11	S000976868	uncultured Facklamia sp.; AV_8R-S-A01; EU341289	2686	0
a62c12	S000128467	Corynebacterium tuberculostearicum (T); CIP107291;	2565	0
a62d02	S000721364	Corynebacterium aurimucosum; AE1-3; AB269764	2529	0
a62d03	S001418802	Staphylococcus haemolyticus; ES-13a2; FN393797	2732	0
a62d04	S000420542	Corynebacterium aurimucosum; NRRL B-24143; H2456; AY536427	2615	0
a62d06	S001095808	Staphylococcus sp. TPL10; EU373380	2565	0
a62d07	S000571643	Staphylococcus haemolyticus JCSC1435; AP006716	2617	0
a62d08	S000128467	Corynebacterium tuberculostearicum (T); CIP107291;	2506	0
a62d10	S000128467	Corynebacterium tuberculostearicum (T); CIP107291;	2696	0
a62d11	S000976868	uncultured Facklamia sp.; AV_8R-S-A01; EU341289	2276	0
a62e01	S000366404	Corynebacterium pseudogenitalium; CIP106714, (ATCC33035),	2639	0
a62e02	S000653747	Staphylococcus sp. CNJ924 PL04; DQ448767	2571	0
a62e03	S000128467	Corynebacterium tuberculostearicum (T); CIP107291;	2664	0
a62e04	S001095808	Staphylococcus sp. TPL10; EU373380	2748	0
a62e06	S000571643	Staphylococcus haemolyticus JCSC1435; AP006716	2672	0
a62e08	S000128467	Corynebacterium tuberculostearicum (T); CIP107291;	2674	0
a62e10	S000337826	uncultured Corynebacterium sp. MTcory16R; AF115941	2504	0
a62f01	S000128467	Corynebacterium tuberculostearicum (T); CIP107291;	2670	0
a62f02	S000130232	Corynebacterium tuberculostearicum; CIP102346; AJ438045	2658	0
a62f03	S000830909	uncultured Sphingobacteriaceae bacterium; Elev_16S_1461;	2454	0
a62f04	S000721364	Corynebacterium aurimucosum; AE1-3; AB269764	2569	0
a62f05	S001544369	uncultured Staphylococcus sp.; GI8-sp-B04; GQ129860	2341	0
a62f08	S000435836	Corynebacterium sp.; SC8; D83375	2292	0
a62f09	S000128467	Corynebacterium tuberculostearicum (T); CIP107291;	2446	0
a62f10	S000639877	Chryseobacterium sp. BBCT14; DQ337556	2091	0
a62f11	S000128467	Corynebacterium tuberculostearicum (T); CIP107291;	2696	0
a62g01	S000420542	Corynebacterium aurimucosum; NRRL B-24143; H2456; AY536427	2583	0
a62g02	S000420542	Corynebacterium aurimucosum; NRRL B-24143; H2456; AY536427	2565	0
a62g03	S000128467	Corynebacterium tuberculostearicum (T); CIP107291;	2678	0
a62g04	S000415358	Staphylococcus sp. H292; AB177642	2702	0
a62g05	S000366404	Corynebacterium pseudogenitalium; CIP106714, (ATCC33035),	2567	0
a62g06	S000005846	Corynebacterium minutissimum; NCTC 10288T; X82064	2527	0
a62g07	S000976868	uncultured Facklamia sp.; AV_8R-S-A01; EU341289	2605	0
a62g09	S000420542	Corynebacterium aurimucosum; NRRL B-24143; H2456; AY536427	2510	0
a62g11	S000128467	Corynebacterium tuberculostearicum (T); CIP107291;	2696	0
a62h01	S000128467	Corynebacterium tuberculostearicum (T); CIP107291;	2668	0
a62h02	S000366404	Corynebacterium pseudogenitalium; CIP106714, (ATCC33035),	2712	0
a62h03	S000420542	Corynebacterium aurimucosum; NRRL B-24143; H2456; AY536427	2583	0
a62h04	S000415358	Staphylococcus sp. H292; AB177642	2686	0
a62h05	S000128467	Corynebacterium tuberculostearicum (T); CIP107291;	2446	0
a62h06	S000571641	Staphylococcus haemolyticus JCSC1435; AP006716	2539	0
a62h08	S000128467	Corynebacterium tuberculostearicum (T); CIP107291;	2640	0
a62h09	S000415358	Staphylococcus sp. H292; AB177642	2583	0
a62h10	S000420542	Corynebacterium aurimucosum; NRRL B-24143; H2456; AY536427	2531	0
a62h11	S000420542	Corynebacterium aurimucosum; NRRL B-24143; H2456; AY536427	2567	0
a63a03	S000128467	Corynebacterium tuberculostearicum (T); CIP107291;	2581	0
a63a04	S000128467	Corynebacterium tuberculostearicum (T); CIP107291;	2545	0
a63a05	S000976868	uncultured Facklamia sp.; AV_8R-S-A01; EU341289	2599	0
a63a06	S000128467	Corynebacterium tuberculostearicum (T); CIP107291;	2145	0
a63a07	S000420542	Corynebacterium aurimucosum; NRRL B-24143; H2456; AY536427	2327	0
a63a09	S000420542	Corynebacterium aurimucosum; NRRL B-24143; H2456; AY536427	2468	0
a63a10	S000128467	Corynebacterium tuberculostearicum (T); CIP107291;	2595	0
a63b01	S000128467	Corynebacterium tuberculostearicum (T); CIP107291;	2601	0
a63b02	S000337826	uncultured Corynebacterium sp. MTcory16R; AF115941	2452	0
a63b03	S000366404	Corynebacterium pseudogenitalium; CIP106714, (ATCC33035),	2426	0
a63b04	S001447757	uncultured Staphylococcus sp.; JPL-S2_E19; FJ957503	1737	0
a63b05	S000366404	Corynebacterium pseudogenitalium; CIP106714, (ATCC33035),	2153	0
a63b07	S000128467	Corynebacterium tuberculostearicum (T); CIP107291;	2639	0
a63b08	S000366404	Corynebacterium pseudogenitalium; CIP106714, (ATCC33035),	2413	0
a63b09	S000420542	Corynebacterium aurimucosum; NRRL B-24143; H2456; AY536427	2615	0
a63b10	S000128467	Corynebacterium tuberculostearicum (T); CIP107291;	2654	0
a63b11	S000128467	Corynebacterium tuberculostearicum (T); CIP107291;	2248	0
a63c01	S000337826	uncultured Corynebacterium sp. MTcory16R; AF115941	2490	0
a63c02	S000128467	Corynebacterium tuberculostearicum (T); CIP107291;	2712	0
a63c03	S000976868	uncultured Facklamia sp.; AV_8R-S-A01; EU341289	2662	0
a63c04	S000420542	Corynebacterium aurimucosum; NRRL B-24143; H2456; AY536427	2549	0
a63c05	S000976868	uncultured Facklamia sp.; AV_8R-S-A01; EU341289	2644	0
a63c06	S000721364	Corynebacterium aurimucosum; AE1-3; AB269764	2537	0
a63c07	S000571643	Staphylococcus haemolyticus JCSC1435; AP006716	2759	0
a63c08	S000366404	Corynebacterium pseudogenitalium; CIP106714, (ATCC33035),	2569	0
a63c09	S000128467	Corynebacterium tuberculostearicum (T); CIP107291;	2684	0
a63c11	S000128467	Corynebacterium tuberculostearicum (T); CIP107291;	2415	0
a63d01	S001095808	Staphylococcus sp. TPL10; EU373380	2658	0
a63d02	S000420542	Corynebacterium aurimucosum; NRRL B-24143; H2456; AY536427	2230	0
a63d03	S000128467	Corynebacterium tuberculostearicum (T); CIP107291;	2581	0
a63d04	S000366404	Corynebacterium pseudogenitalium; CIP106714, (ATCC33035),	2674	0
a63d05	S000389740	Corynebacterium sp. 61720; AF234634	2190	0
a63d06	S000996242	Porphyromonas bennonis (T); WAL 1926C; EU414673	2347	0
a63d07	S000019066	Facklamia languida (T); 1144-97; Y18053	2615	0
a63d09	S001095808	Staphylococcus sp. TPL10; EU373380	2732	0
a63d10	S000128467	Corynebacterium tuberculostearicum (T); CIP107291;	2652	0
a63d11	S000128467	Corynebacterium tuberculostearicum (T); CIP107291;	2482	0
a63e02	S000420542	Corynebacterium aurimucosum; NRRL B-24143; H2456; AY536427	2607	0
a63e03	S000514602	Staphylococcus croceolyticus; MCC10046; AY953148	2702	0
a63e04	S000005846	Corynebacterium minutissimum; NCTC 10288T; X82064	2403	0
a63e06	S000128467	Corynebacterium tuberculostearicum (T); CIP107291;	2526	0
a63e08	S001095808	Staphylococcus sp. TPL10; EU373380	2732	0
a63e09	S000420542	Corynebacterium aurimucosum; NRRL B-24143; H2456; AY536427	2405	0
a63e10	S000128467	Corynebacterium tuberculostearicum (T); CIP107291;	2666	0
a63e12	S000721364	Corynebacterium aurimucosum; AE1-3; AB269764	2508	0
a63f01	S000415358	Staphylococcus sp. H292; AB177642	2714	0
a63f02	S001549312	Pseudomonas poae; LS172; FJ937922	2710	0
a63f03	S000002016	Anaerococcus octavius (T); NCTC 9810; Y07841	2353	0
a63f04	S000628247	Staphylococcus epidermidis ATCC 12228; AE015929	2714	0
a63f05	S000653747	Staphylococcus sp. CNJ924 PL04; DQ448767	2359	0
a63f06	S000128467	Corynebacterium tuberculostearicum (T); CIP107291;	2204	0
a63f08	S000366404	Corynebacterium pseudogenitalium; CIP106714, (ATCC33035),	2480	0
a63f09	S000976868	uncultured Facklamia sp.; AV_8R-S-A01; EU341289	2668	0
a63f10	S000128467	Corynebacterium tuberculostearicum (T); CIP107291;	2539	0
a63f11	S000337826	uncultured Corynebacterium sp. MTcory16R; AF115941	2571	0
a63f12	S000721364	Corynebacterium aurimucosum; AE1-3; AB269764	2508	0
a63g02	S000128467	Corynebacterium tuberculostearicum (T); CIP107291;	2720	0
a63g03	S001198137	Streptococcus agalactiae 2603V/R; AE009948	2712	0
a63g04	S000514602	Staphylococcus croceolyticus; MCC10046; AY953148	2726	0
a63g05	S000128467	Corynebacterium tuberculostearicum (T); CIP107291;	2343	0
a63g07	S000721364	Corynebacterium aurimucosum; AE1-3; AB269764	2549	0
a63g08	S000721364	Corynebacterium aurimucosum; AE1-3; AB269764	2543	0
a63g09	S000019066	Facklamia languida (T); 1144-97; Y18053	2670	0
a63g10	S000128467	Corynebacterium tuberculostearicum (T); CIP107291;	2696	0
a63g11	S000130866	Corynebacterium tuberculostearicum; CIP107067; AJ438051	2720	0
a63h02	S000016131	Corynebacterium singulare (T); IBS B52218; CCUG 37330;	2357	0
a63h03	S000420542	Corynebacterium aurimucosum; NRRL B-24143; H2456; AY536427	2567	0
a63h05	S001418802	Staphylococcus haemolyticus; ES-13a2; FN393797	2724	0
a63h06	S000130232	Corynebacterium tuberculostearicum; CIP102346; AJ438045	2629	0
a63h07	S001016338	Ochrobactrum sp. PED4-7; EU529846	2480	0
a63h08	S000005846	Corynebacterium minutissimum; NCTC 10288T; X82064	2345	0
a63h09	S001095808	Staphylococcus sp. TPL10; EU373380	2567	0
a63h10	S001447736	uncultured Staphylococcus sp.; JPL-1_O09; FJ957482	2698	0
a63h11	S000976868	uncultured Facklamia sp.; AV_8R-S-A01; EU341289	2686	0
a64a04	S000721364	Corynebacterium aurimucosum; AE1-3; AB269764	2401	0
a64a08	S000019066	Facklamia languida (T); 1144-97; Y18053	2591	0
a64a10	S000366404	Corynebacterium pseudogenitalium; CIP106714, (ATCC33035),	2635	0
a64a11	S000128467	Corynebacterium tuberculostearicum (T); CIP107291;	2416	0
a64b02	S000366404	Corynebacterium pseudogenitalium; CIP106714, (ATCC33035),	2252	0
a64b03	S001095808	Staphylococcus sp. TPL10; EU373380	2702	0
a64b04	S000128467	Corynebacterium tuberculostearicum (T); CIP107291;	2694	0
a64b05	S000976868	uncultured Facklamia sp.; AV_8R-S-A01; EU341289	2561	0
a64b06	S001796257	Corynebacterium sp. NML99-0020; GU304643	2633	0
a64b08	S000721364	Corynebacterium aurimucosum; AE1-3; AB269764	2079	0
a64b09	S000019066	Facklamia languida (T); 1144-97; Y18053	2573	0
a64b10	S000571641	Staphylococcus haemolyticus JCSC1435; AP006716	2454	0
a64b11	S000415358	Staphylococcus sp. H292; AB177642	2361	0
a64c01	S001095808	Staphylococcus sp. TPL10; EU373380	2724	0
a64c02	S000415358	Staphylococcus sp. H292; AB177642	2169	0
a64c03	S000514602	Staphylococcus croceolyticus; MCC10046; AY953148	2682	0
a64c05	S000415358	Staphylococcus sp. H292; AB177642	2722	0
a64c06	S000002016	Anaerococcus octavius (T); NCTC 9810; Y07841	2220	0
a64c07	S001095808	Staphylococcus sp. TPL10; EU373380	2662	0
a64c08	S000337826	uncultured Corynebacterium sp. MTcory16R; AF115941	2460	0
a64c09	S001587932	Anaerococcus prevotii DSM 20548; CP001708	2183	0
a64c10	S000493255	uncultured Bacteroidetes bacterium; AKYG467; AY922021	2353	0
a64c11	S000503804	Corynebacterium sp. 25850; AY581881	2452	0
a64d02	S000128467	Corynebacterium tuberculostearicum (T); CIP107291;	2432	0
a64d04	S000128467	Corynebacterium tuberculostearicum (T); CIP107291;	2434	0
a64d06	S000721364	Corynebacterium aurimucosum; AE1-3; AB269764	2236	0
a64d07	S000415358	Staphylococcus sp. H292; AB177642	2603	0
a64d08	S000721364	Corynebacterium aurimucosum; AE1-3; AB269764	2484	0
a64e02	S000420542	Corynebacterium aurimucosum; NRRL B-24143; H2456; AY536427	2401	0
a64e03	S001095808	Staphylococcus sp. TPL10; EU373380	2742	0
a64e04	S000415358	Staphylococcus sp. H292; AB177642	2767	0
a64e05	S000976868	uncultured Facklamia sp.; AV_8R-S-A01; EU341289	2103	0
a64e06	S000337826	uncultured Corynebacterium sp. MTcory16R; AF115941	2163	0
a64e07	S000128467	Corynebacterium tuberculostearicum (T); CIP107291;	2498	0
a64e08	S000415358	Staphylococcus sp. H292; AB177642	2767	0
a64e09	S000514602	Staphylococcus croceolyticus; MCC10046; AY953148	2702	0
a64f01	S000337826	uncultured Corynebacterium sp. MTcory16R; AF115941	2490	0
a64f02	S000366404	Corynebacterium pseudogenitalium; CIP106714, (ATCC33035),	2603	0
a64f03	S000420542	Corynebacterium aurimucosum; NRRL B-24143; H2456; AY536427	2587	0
a64f04	S000721364	Corynebacterium aurimucosum; AE1-3; AB269764	2422	0
a64f05	S001796257	Corynebacterium sp. NML99-0020; GU304643	2526	0
a64f06	S000976868	uncultured Facklamia sp.; AV_8R-S-A01; EU341289	2518	0
a64f07	S000607914	Staphylococcus sp. R-25050; AM084016	2355	0
a64f08	S000607914	Staphylococcus sp. R-25050; AM084016	2660	0
a64f09	S000420542	Corynebacterium aurimucosum; NRRL B-24143; H2456; AY536427	2571	0
a64f10	S000420542	Corynebacterium aurimucosum; NRRL B-24143; H2456; AY536427	2599	0
a64f12	S000721364	Corynebacterium aurimucosum; AE1-3; AB269764	2563	0
a64g02	S000415358	Staphylococcus sp. H292; AB177642	2775	0
a64g03	S000366404	Corynebacterium pseudogenitalium; CIP106714, (ATCC33035),	2712	0
a64g04	S000420542	Corynebacterium aurimucosum; NRRL B-24143; H2456; AY536427	2357	0
a64g05	S000420542	Corynebacterium aurimucosum; NRRL B-24143; H2456; AY536427	2577	0
a64g06	S000653747	Staphylococcus sp. CNJ924 PL04; DQ448767	2700	0
a64g07	S000435836	Corynebacterium sp.; SC8; D83375	2514	0
a64g08	S000571643	Staphylococcus haemolyticus JCSC1435; AP006716	2728	0
a64g09	S000420542	Corynebacterium aurimucosum; NRRL B-24143; H2456; AY536427	2563	0
a64g10	S001095808	Staphylococcus sp. TPL10; EU373380	2385	0
a64g11	S000128467	Corynebacterium tuberculostearicum (T); CIP107291;	2680	0
a64h02	S001178835	uncultured Stenotrophomonas sp.; GI6-10b-C05; FJ193149	2472	0
a64h03	S000420542	Corynebacterium aurimucosum; NRRL B-24143; H2456; AY536427	2454	0
a64h04	S000976868	uncultured Facklamia sp.; AV_8R-S-A01; EU341289	2621	0
a64h05	S001793863	Aeromonas salmonicida subsp. salmonicida; CIP 57.50;	2670	0
a64h06	S000571641	Staphylococcus haemolyticus JCSC1435; AP006716	2646	0
a64h07	S000128467	Corynebacterium tuberculostearicum (T); CIP107291;	2670	0
a64h08	S000366404	Corynebacterium pseudogenitalium; CIP106714, (ATCC33035),	2399	0
a64h09	S000366404	Corynebacterium pseudogenitalium; CIP106714, (ATCC33035),	2607	0
a64h10	S000005846	Corynebacterium minutissimum; NCTC 10288T; X82064	2545	0
a33a03	S001152605	Stenotrophomonas maltophilia; DN1.1; EU034540	2702	0
a33a10	S001910616	Lactobacillus iners (T); type strain: CCUG 28746; Y16329	2777	0
a35a08	S001546262	uncultured Gardnerella sp.; VE1A04; GQ179719	2633	0
a33a01	S001910616	Lactobacillus iners (T); type strain: CCUG 28746; Y16329	2662	0
a33a02	S000412018	Lactobacillus iners; VA15_2004; AY526083	2642	0
a33a04	S001910616	Lactobacillus iners (T); type strain: CCUG 28746; Y16329	2732	0
a33a06	S001792989	Propionibacterium acnes; JCM 6425; AB538431	2631	0
a33a08	S000412018	Lactobacillus iners; VA15_2004; AY526083	2064	0
a33a09	S000412018	Lactobacillus iners; VA15_2004; AY526083	2710	0
a33a11	S001910616	Lactobacillus iners (T); type strain: CCUG 28746; Y16329	2759	0
a33b01	S001910616	Lactobacillus iners (T); type strain: CCUG 28746; Y16329	2708	0
a33b02	S001910616	Lactobacillus iners (T); type strain: CCUG 28746; Y16329	2732	0
a33b03	S000965282	Delftia acidovorans SPH-1; CP000884	2623	0
a33b05	S001910616	Lactobacillus iners (T); type strain: CCUG 28746; Y16329	2753	0
a33b06	S001910616	Lactobacillus iners (T); type strain: CCUG 28746; Y16329	2761	0
a33b07	S001910616	Lactobacillus iners (T); type strain: CCUG 28746; Y16329	2777	0
a33b08	S001792989	Propionibacterium acnes; JCM 6425; AB538431	2716	0
a33b09	S001910616	Lactobacillus iners (T); type strain: CCUG 28746; Y16329	2761	0
a33b10	S001910616	Lactobacillus iners (T); type strain: CCUG 28746; Y16329	2571	0
a33b11	S001910616	Lactobacillus iners (T); type strain: CCUG 28746; Y16329	2777	0
a33c01	S001910616	Lactobacillus iners (T); type strain: CCUG 28746; Y16329	2785	0
a33c02	S001910616	Lactobacillus iners (T); type strain: CCUG 28746; Y16329	2769	0
a33c03	S001910616	Lactobacillus iners (T); type strain: CCUG 28746; Y16329	2763	0
a33c04	S001909596	Bacillus sp. oral taxon F28; VK010; GU431508	950	0
a33c05	S001610971	Escherichia coli DH1; CP001637	2696	0
a33c06	S001910616	Lactobacillus iners (T); type strain: CCUG 28746; Y16329	2753	0
a33c07	S001910616	Lactobacillus iners (T); type strain: CCUG 28746; Y16329	2761	0
a33c08	S000432299	Anaerococcus lactolyticus (T); CCUG 31351; AF542233	2617	0
a33c09	S001910616	Lactobacillus iners (T); type strain: CCUG 28746; Y16329	2746	0
a33c10	S001910616	Lactobacillus iners (T); type strain: CCUG 28746; Y16329	2635	0
a33c11	S000965282	Delftia acidovorans SPH-1; CP000884	2724	0
a33c12	S001910616	Lactobacillus iners (T); type strain: CCUG 28746; Y16329	2740	0
a33d02	S001910616	Lactobacillus iners (T); type strain: CCUG 28746; Y16329	2777	0
a33d03	S001910616	Lactobacillus iners (T); type strain: CCUG 28746; Y16329	2761	0
a33d04	S001910616	Lactobacillus iners (T); type strain: CCUG 28746; Y16329	2769	0
a33d05	S001872672	Gardnerella vaginalis 409-05; CP001849	2696	0
a33d06	S001910616	Lactobacillus iners (T); type strain: CCUG 28746; Y16329	2769	0
a33d07	S001572969	Escherichia coli BL21(DE3); CP001665	2750	0
a33d08	S001546235	uncultured Peptostreptococcus sp.; VE58A09; GQ179692	2587	0
a33d09	S001910616	Lactobacillus iners (T); type strain: CCUG 28746; Y16329	2777	0
a33d10	S000965282	Delftia acidovorans SPH-1; CP000884	2732	0
a33d11	S001546262	uncultured Gardnerella sp.; VE1A04; GQ179719	2640	0
a33d12	S001910616	Lactobacillus iners (T); type strain: CCUG 28746; Y16329	2753	0
a33e02	S001910616	Lactobacillus iners (T); type strain: CCUG 28746; Y16329	2753	0
a33e03	S001910616	Lactobacillus iners (T); type strain: CCUG 28746; Y16329	2755	0
a33e04	S001910616	Lactobacillus iners (T); type strain: CCUG 28746; Y16329	2761	0
a33e06	S001910616	Lactobacillus iners (T); type strain: CCUG 28746; Y16329	2761	0
a33e07	S001910616	Lactobacillus iners (T); type strain: CCUG 28746; Y16329	2738	0
a33e08	S001910616	Lactobacillus iners (T); type strain: CCUG 28746; Y16329	2777	0
a33e09	S000412018	Lactobacillus iners; VA15_2004; AY526083	2702	0
a33e10	S001910616	Lactobacillus iners (T); type strain: CCUG 28746; Y16329	2769	0
a33e12	S001910616	Lactobacillus iners (T); type strain: CCUG 28746; Y16329	2777	0
a33f01	S001910616	Lactobacillus iners (T); type strain: CCUG 28746; Y16329	2755	0
a33f02	S001910616	Lactobacillus iners (T); type strain: CCUG 28746; Y16329	2761	0
a33f04	S001910616	Lactobacillus iners (T); type strain: CCUG 28746; Y16329	2716	0
a33f05	S001910616	Lactobacillus iners (T); type strain: CCUG 28746; Y16329	2740	0
a33f06	S001910616	Lactobacillus iners (T); type strain: CCUG 28746; Y16329	2748	0
a33f07	S001910616	Lactobacillus iners (T); type strain: CCUG 28746; Y16329	2734	0
a33f08	S001910616	Lactobacillus iners (T); type strain: CCUG 28746; Y16329	2769	0
a33f09	S001910616	Lactobacillus iners (T); type strain: CCUG 28746; Y16329	2732	0
a33f10	S001792989	Propionibacterium acnes; JCM 6425; AB538431	2708	0
a33f11	S001910616	Lactobacillus iners (T); type strain: CCUG 28746; Y16329	2763	0
a33f12	S001910616	Lactobacillus iners (T); type strain: CCUG 28746; Y16329	2769	0
a33g01	S001910616	Lactobacillus iners (T); type strain: CCUG 28746; Y16329	2761	0
a33g02	S001910616	Lactobacillus iners (T); type strain: CCUG 28746; Y16329	2761	0
a33g04	S001910616	Lactobacillus iners (T); type strain: CCUG 28746; Y16329	2769	0
a33g05	S001610971	Escherichia coli DH1; CP001637	2298	0
a33g06	S001910616	Lactobacillus iners (T); type strain: CCUG 28746; Y16329	2763	0
a33g07	S000692490	uncultured gamma proteobacterium; G07_WMSP1; DQ450792	1417	0
a33g08	S001910616	Lactobacillus iners (T); type strain: CCUG 28746; Y16329	2724	0
a33g09	S000412018	Lactobacillus iners; VA15_2004; AY526083	2664	0
a33g10	S001910616	Lactobacillus iners (T); type strain: CCUG 28746; Y16329	2714	0
a33g11	S001910616	Lactobacillus iners (T); type strain: CCUG 28746; Y16329	2777	0
a33h01	S001910616	Lactobacillus iners (T); type strain: CCUG 28746; Y16329	2761	0
a33h02	S000412018	Lactobacillus iners; VA15_2004; AY526083	2716	0
a33h03	S001910616	Lactobacillus iners (T); type strain: CCUG 28746; Y16329	2746	0
a33h04	S000965282	Delftia acidovorans SPH-1; CP000884	2700	0
a33h05	S001910616	Lactobacillus iners (T); type strain: CCUG 28746; Y16329	2702	0
a33h06	S001910616	Lactobacillus iners (T); type strain: CCUG 28746; Y16329	2771	0
a33h07	S000965282	Delftia acidovorans SPH-1; CP000884	2666	0
a33h08	S001910616	Lactobacillus iners (T); type strain: CCUG 28746; Y16329	2720	0
a33h09	S001910616	Lactobacillus iners (T); type strain: CCUG 28746; Y16329	2694	0
a33h10	S000412018	Lactobacillus iners; VA15_2004; AY526083	2716	0
a33h11	S001199184	Halalkalibacillus sp. B3A; FJ347755	1439	0
a34a02	S000412018	Lactobacillus iners; VA15_2004; AY526083	2524	0
a34a03	S000412018	Lactobacillus iners; VA15_2004; AY526083	2593	0
a34a04	S000965282	Delftia acidovorans SPH-1; CP000884	2522	0
a34a05	S000412018	Lactobacillus iners; VA15_2004; AY526083	2510	0
a34a06	S001792989	Propionibacterium acnes; JCM 6425; AB538431	2654	0
a34a07	S001910616	Lactobacillus iners (T); type strain: CCUG 28746; Y16329	2577	0
a34a08	S001558968	uncultured Rothia sp.; 10B504; FJ976306	2520	0
a34a09	S001910616	Lactobacillus iners (T); type strain: CCUG 28746; Y16329	2623	0
a34a11	S000412018	Lactobacillus iners; VA15_2004; AY526083	2597	0
a34a12	S000412018	Lactobacillus iners; VA15_2004; AY526083	2539	0
a34b01	S001910616	Lactobacillus iners (T); type strain: CCUG 28746; Y16329	2753	0
a34b02	S001546262	uncultured Gardnerella sp.; VE1A04; GQ179719	2650	0
a34b03	S001910616	Lactobacillus iners (T); type strain: CCUG 28746; Y16329	2670	0
a34b04	S001910616	Lactobacillus iners (T); type strain: CCUG 28746; Y16329	2753	0
a34b05	S001910616	Lactobacillus iners (T); type strain: CCUG 28746; Y16329	2769	0
a34b06	S001910616	Lactobacillus iners (T); type strain: CCUG 28746; Y16329	2777	0
a34b08	S001910616	Lactobacillus iners (T); type strain: CCUG 28746; Y16329	2753	0
a34b09	S001910616	Lactobacillus iners (T); type strain: CCUG 28746; Y16329	2722	0
a34b10	S001148202	uncultured soil bacterium; bacnit44; EU861897	1925	0
a34b11	S001910616	Lactobacillus iners (T); type strain: CCUG 28746; Y16329	2761	0
a34b12	S000412018	Lactobacillus iners; VA15_2004; AY526083	2454	0
a34c01	S001910616	Lactobacillus iners (T); type strain: CCUG 28746; Y16329	2769	0
a34c02	S001910616	Lactobacillus iners (T); type strain: CCUG 28746; Y16329	2654	0
a34c03	S001910616	Lactobacillus iners (T); type strain: CCUG 28746; Y16329	2702	0
a34c04	S001910616	Lactobacillus iners (T); type strain: CCUG 28746; Y16329	2753	0
a34c05	S001910616	Lactobacillus iners (T); type strain: CCUG 28746; Y16329	2769	0
a34c06	S001910616	Lactobacillus iners (T); type strain: CCUG 28746; Y16329	2730	0
a34c07	S001910616	Lactobacillus iners (T); type strain: CCUG 28746; Y16329	2755	0
a34c08	S001910616	Lactobacillus iners (T); type strain: CCUG 28746; Y16329	2708	0
a34c09	S001910616	Lactobacillus iners (T); type strain: CCUG 28746; Y16329	2769	0
a34c10	S001910616	Lactobacillus iners (T); type strain: CCUG 28746; Y16329	2748	0
a34c11	S001910616	Lactobacillus iners (T); type strain: CCUG 28746; Y16329	2761	0
a34c12	S001910616	Lactobacillus iners (T); type strain: CCUG 28746; Y16329	2777	0
a34d02	S001910616	Lactobacillus iners (T); type strain: CCUG 28746; Y16329	2761	0
a34d03	S001910616	Lactobacillus iners (T); type strain: CCUG 28746; Y16329	2724	0
a34d04	S001910616	Lactobacillus iners (T); type strain: CCUG 28746; Y16329	2761	0
a34d05	S001910616	Lactobacillus iners (T); type strain: CCUG 28746; Y16329	2753	0
a34d06	S001910616	Lactobacillus iners (T); type strain: CCUG 28746; Y16329	2777	0
a34d07	S001910616	Lactobacillus iners (T); type strain: CCUG 28746; Y16329	2777	0
a34d08	S001910616	Lactobacillus iners (T); type strain: CCUG 28746; Y16329	2769	0
a34d09	S001910616	Lactobacillus iners (T); type strain: CCUG 28746; Y16329	2769	0
a34d10	S000692490	uncultured gamma proteobacterium; G07_WMSP1; DQ450792	1455	0
a34d11	S001910616	Lactobacillus iners (T); type strain: CCUG 28746; Y16329	2771	0
a34d12	S001910616	Lactobacillus iners (T); type strain: CCUG 28746; Y16329	2738	0
a34e01	S001910616	Lactobacillus iners (T); type strain: CCUG 28746; Y16329	2753	0
a34e02	S001910616	Lactobacillus iners (T); type strain: CCUG 28746; Y16329	2785	0
a34e03	S001910616	Lactobacillus iners (T); type strain: CCUG 28746; Y16329	2761	0
a34e04	S001910616	Lactobacillus iners (T); type strain: CCUG 28746; Y16329	2714	0
a34e06	S001199184	Halalkalibacillus sp. B3A; FJ347755	1431	0
a34e07	S001910616	Lactobacillus iners (T); type strain: CCUG 28746; Y16329	2753	0
a34e08	S001910616	Lactobacillus iners (T); type strain: CCUG 28746; Y16329	2753	0
a34e09	S001910616	Lactobacillus iners (T); type strain: CCUG 28746; Y16329	2769	0
a34e10	S001910616	Lactobacillus iners (T); type strain: CCUG 28746; Y16329	2746	0
a34e11	S000125884	Propionibacterium acnes; #5255; AB108482	2587	0
a34e12	S001910616	Lactobacillus iners (T); type strain: CCUG 28746; Y16329	2728	0
a34f01	S001910616	Lactobacillus iners (T); type strain: CCUG 28746; Y16329	2753	0
a34f02	S000965282	Delftia acidovorans SPH-1; CP000884	2724	0
a34f03	S001910616	Lactobacillus iners (T); type strain: CCUG 28746; Y16329	2769	0
a34f04	S001910616	Lactobacillus iners (T); type strain: CCUG 28746; Y16329	2761	0
a34f05	S001910616	Lactobacillus iners (T); type strain: CCUG 28746; Y16329	2740	0
a34f06	S001910616	Lactobacillus iners (T); type strain: CCUG 28746; Y16329	2777	0
a34f08	S001872672	Gardnerella vaginalis 409-05; CP001849	2664	0
a34f10	S000965282	Delftia acidovorans SPH-1; CP000884	2670	0
a34f11	S000944447	uncultured Streptococcus sp.; 102H10(oral); AM420009	2656	0
a34f12	S001910616	Lactobacillus iners (T); type strain: CCUG 28746; Y16329	2738	0
a34g01	S001910616	Lactobacillus iners (T); type strain: CCUG 28746; Y16329	2541	0
a34g02	S001910616	Lactobacillus iners (T); type strain: CCUG 28746; Y16329	2777	0
a34g03	S001910616	Lactobacillus iners (T); type strain: CCUG 28746; Y16329	2761	0
a34g04	S001910616	Lactobacillus iners (T); type strain: CCUG 28746; Y16329	2763	0
a34g06	S001910616	Lactobacillus iners (T); type strain: CCUG 28746; Y16329	2759	0
a34g07	S001910616	Lactobacillus iners (T); type strain: CCUG 28746; Y16329	2724	0
a34g08	S000412018	Lactobacillus iners; VA15_2004; AY526083	2652	0
a34g09	S001910616	Lactobacillus iners (T); type strain: CCUG 28746; Y16329	2722	0
a34g10	S001910616	Lactobacillus iners (T); type strain: CCUG 28746; Y16329	2688	0
a34g11	S001910616	Lactobacillus iners (T); type strain: CCUG 28746; Y16329	2740	0
a34g12	S000412018	Lactobacillus iners; VA15_2004; AY526083	2629	0
a34h01	S001910616	Lactobacillus iners (T); type strain: CCUG 28746; Y16329	2696	0
a34h02	S001872672	Gardnerella vaginalis 409-05; CP001849	2637	0
a34h03	S001910616	Lactobacillus iners (T); type strain: CCUG 28746; Y16329	2611	0
a34h04	S001910616	Lactobacillus iners (T); type strain: CCUG 28746; Y16329	2595	0
a34h05	S001910616	Lactobacillus iners (T); type strain: CCUG 28746; Y16329	2557	0
a34h06	S001910616	Lactobacillus iners (T); type strain: CCUG 28746; Y16329	2670	0
a34h07	S001792989	Propionibacterium acnes; JCM 6425; AB538431	2605	0
a34h08	S000412018	Lactobacillus iners; VA15_2004; AY526083	2196	0
a34h09	S001910616	Lactobacillus iners (T); type strain: CCUG 28746; Y16329	2688	0
a34h10	S000965282	Delftia acidovorans SPH-1; CP000884	2601	0
a34h11	S000412018	Lactobacillus iners; VA15_2004; AY526083	2615	0
a34h12	S001910616	Lactobacillus iners (T); type strain: CCUG 28746; Y16329	2686	0
a35a01	S000412018	Lactobacillus iners; VA15_2004; AY526083	2648	0
a35a02	S000412018	Lactobacillus iners; VA15_2004; AY526083	2529	0
a35a04	S000412018	Lactobacillus iners; VA15_2004; AY526083	2676	0
a35a05	S000412018	Lactobacillus iners; VA15_2004; AY526083	2454	0
a35a06	S000412018	Lactobacillus iners; VA15_2004; AY526083	2553	0
a35a07	S000412018	Lactobacillus iners; VA15_2004; AY526083	2595	0
a35a09	S001254159	uncultured Clostridium sp.; A05-10B; FJ542861	2561	0
a35a10	S000412018	Lactobacillus iners; VA15_2004; AY526083	2648	0
a35a12	S000405651	Streptococcus mitis; ATCC 15914; AY281076	2652	0
a35b01	S001910616	Lactobacillus iners (T); type strain: CCUG 28746; Y16329	2769	0
a35b02	S001910616	Lactobacillus iners (T); type strain: CCUG 28746; Y16329	2769	0
a35b03	S000944447	uncultured Streptococcus sp.; 102H10(oral); AM420009	2629	0
a35b04	S001910616	Lactobacillus iners (T); type strain: CCUG 28746; Y16329	2724	0
a35b05	S001910616	Lactobacillus iners (T); type strain: CCUG 28746; Y16329	2710	0
a35b06	S001910616	Lactobacillus iners (T); type strain: CCUG 28746; Y16329	2668	0
a35b07	S000944447	uncultured Streptococcus sp.; 102H10(oral); AM420009	2716	0
a35b08	S001910616	Lactobacillus iners (T); type strain: CCUG 28746; Y16329	2771	0
a35b10	S000608030	Dechloromonas sp. R-28400; AM084133	1959	0
a35b11	S001910616	Lactobacillus iners (T); type strain: CCUG 28746; Y16329	2746	0
a35c01	S001910616	Lactobacillus iners (T); type strain: CCUG 28746; Y16329	2785	0
a35c02	S001910616	Lactobacillus iners (T); type strain: CCUG 28746; Y16329	2769	0
a35c03	S001910616	Lactobacillus iners (T); type strain: CCUG 28746; Y16329	2724	0
a35c04	S001910616	Lactobacillus iners (T); type strain: CCUG 28746; Y16329	2656	0
a35c05	S000965282	Delftia acidovorans SPH-1; CP000884	2732	0
a35c06	S001910616	Lactobacillus iners (T); type strain: CCUG 28746; Y16329	2761	0
a35c07	S001910616	Lactobacillus iners (T); type strain: CCUG 28746; Y16329	2777	0
a35c08	S000944447	uncultured Streptococcus sp.; 102H10(oral); AM420009	2730	0
a35c09	S001546274	uncultured Aerococcus sp.; VE4G11; GQ179731	2678	0
a35c11	S001910616	Lactobacillus iners (T); type strain: CCUG 28746; Y16329	2769	0
a35c12	S001910616	Lactobacillus iners (T); type strain: CCUG 28746; Y16329	2761	0
a35d02	S000965282	Delftia acidovorans SPH-1; CP000884	2686	0
a35d03	S001610969	Escherichia coli DH1; CP001637	2704	0
a35d04	S001910616	Lactobacillus iners (T); type strain: CCUG 28746; Y16329	2769	0
a35d06	S001910616	Lactobacillus iners (T); type strain: CCUG 28746; Y16329	2801	0
a35d07	S001910616	Lactobacillus iners (T); type strain: CCUG 28746; Y16329	2753	0
a35d08	S001910616	Lactobacillus iners (T); type strain: CCUG 28746; Y16329	2769	0
a35d09	S001872672	Gardnerella vaginalis 409-05; CP001849	2682	0
a35d10	S001910616	Lactobacillus iners (T); type strain: CCUG 28746; Y16329	2769	0
a35d11	S001546274	uncultured Aerococcus sp.; VE4G11; GQ179731	2702	0
a35d12	S001910616	Lactobacillus iners (T); type strain: CCUG 28746; Y16329	2769	0
a35e02	S001910616	Lactobacillus iners (T); type strain: CCUG 28746; Y16329	2748	0
a35e03	S000944447	uncultured Streptococcus sp.; 102H10(oral); AM420009	2706	0
a35e04	S001910616	Lactobacillus iners (T); type strain: CCUG 28746; Y16329	2748	0
a35e06	S001792989	Propionibacterium acnes; JCM 6425; AB538431	2684	0
a35e07	S001910616	Lactobacillus iners (T); type strain: CCUG 28746; Y16329	2732	0
a35e08	S001910616	Lactobacillus iners (T); type strain: CCUG 28746; Y16329	2777	0
a35e09	S001792989	Propionibacterium acnes; JCM 6425; AB538431	2684	0
a35e10	S001910616	Lactobacillus iners (T); type strain: CCUG 28746; Y16329	2761	0
a35e11	S001910616	Lactobacillus iners (T); type strain: CCUG 28746; Y16329	2777	0
a35e12	S001910616	Lactobacillus iners (T); type strain: CCUG 28746; Y16329	2777	0
a35f01	S000412018	Lactobacillus iners; VA15_2004; AY526083	2678	0
a35f02	S001792989	Propionibacterium acnes; JCM 6425; AB538431	2716	0
a35f03	S001610971	Escherichia coli DH1; CP001637	2504	0
a35f04	S001910616	Lactobacillus iners (T); type strain: CCUG 28746; Y16329	2761	0
a35f06	S001910616	Lactobacillus iners (T); type strain: CCUG 28746; Y16329	2740	0
a35f07	S001910616	Lactobacillus iners (T); type strain: CCUG 28746; Y16329	2549	0
a35f08	S001910616	Lactobacillus iners (T); type strain: CCUG 28746; Y16329	2714	0
a35f09	S001910616	Lactobacillus iners (T); type strain: CCUG 28746; Y16329	2529	0
a35f10	S001910616	Lactobacillus iners (T); type strain: CCUG 28746; Y16329	2561	0
a35f11	S000818944	uncultured Anaerococcus sp.; 1P1-20; EF419345	2664	0
a35f12	S001910616	Lactobacillus iners (T); type strain: CCUG 28746; Y16329	2777	0
a35g01	S001910616	Lactobacillus iners (T); type strain: CCUG 28746; Y16329	2761	0
a35g02	S001910616	Lactobacillus iners (T); type strain: CCUG 28746; Y16329	2771	0
a35g03	S000412018	Lactobacillus iners; VA15_2004; AY526083	2750	0
a35g04	S001910616	Lactobacillus iners (T); type strain: CCUG 28746; Y16329	2520	0
a35g05	S000944447	uncultured Streptococcus sp.; 102H10(oral); AM420009	2579	0
a35g07	S001872672	Gardnerella vaginalis 409-05; CP001849	2642	0
a35g08	S001792989	Propionibacterium acnes; JCM 6425; AB538431	2708	0
a35g09	S001910616	Lactobacillus iners (T); type strain: CCUG 28746; Y16329	2700	0
a35g10	S001910616	Lactobacillus iners (T); type strain: CCUG 28746; Y16329	2761	0
a35g11	S001872672	Gardnerella vaginalis 409-05; CP001849	2688	0
a35g12	S001910616	Lactobacillus iners (T); type strain: CCUG 28746; Y16329	2769	0
a35h01	S001792989	Propionibacterium acnes; JCM 6425; AB538431	2666	0
a35h02	S001910616	Lactobacillus iners (T); type strain: CCUG 28746; Y16329	2746	0
a35h03	S001199184	Halalkalibacillus sp. B3A; FJ347755	1431	0
a35h04	S001910616	Lactobacillus iners (T); type strain: CCUG 28746; Y16329	2740	0
a35h05	S001910616	Lactobacillus iners (T); type strain: CCUG 28746; Y16329	2692	0
a35h06	S001910616	Lactobacillus iners (T); type strain: CCUG 28746; Y16329	2690	0
a35h07	S001910616	Lactobacillus iners (T); type strain: CCUG 28746; Y16329	2728	0
a35h08	S000412018	Lactobacillus iners; VA15_2004; AY526083	2690	0
a35h09	S001910616	Lactobacillus iners (T); type strain: CCUG 28746; Y16329	2736	0
a35h10	S000412018	Lactobacillus iners; VA15_2004; AY526083	2716	0
a35h11	S001910616	Lactobacillus iners (T); type strain: CCUG 28746; Y16329	2730	0
a35h12	S001910616	Lactobacillus iners (T); type strain: CCUG 28746; Y16329	2557	0
a36a01	S000412018	Lactobacillus iners; VA15_2004; AY526083	2541	0
a36a04	S001546274	uncultured Aerococcus sp.; VE4G11; GQ179731	2533	0
a36a06	S001910616	Lactobacillus iners (T); type strain: CCUG 28746; Y16329	2678	0
a36a07	S001910616	Lactobacillus iners (T); type strain: CCUG 28746; Y16329	2615	0
a36a08	S000412018	Lactobacillus iners; VA15_2004; AY526083	2631	0
a36a10	S001341132	uncultured marine bacterium; A6-3-69; FJ826377	2428	0
a36a11	S000412018	Lactobacillus iners; VA15_2004; AY526083	2633	0
a36b01	S001910616	Lactobacillus iners (T); type strain: CCUG 28746; Y16329	2623	0
a36b02	S001910616	Lactobacillus iners (T); type strain: CCUG 28746; Y16329	2714	0
a36b03	S001910616	Lactobacillus iners (T); type strain: CCUG 28746; Y16329	2648	0
a36b04	S001873892	Methylobacterium zatmanii; 7211; GU294329	2385	0
a36b05	S001910616	Lactobacillus iners (T); type strain: CCUG 28746; Y16329	2589	0
a36b06	S001910616	Lactobacillus iners (T); type strain: CCUG 28746; Y16329	2724	0
a36b07	S001910616	Lactobacillus iners (T); type strain: CCUG 28746; Y16329	2545	0
a36b08	S000125884	Propionibacterium acnes; #5255; AB108482	2700	0
a36b09	S001910616	Lactobacillus iners (T); type strain: CCUG 28746; Y16329	2740	0
a36b10	S001909596	Bacillus sp. oral taxon F28; VK010; GU431508	957	0
a36b11	S001792989	Propionibacterium acnes; JCM 6425; AB538431	2674	0
a36b12	S000412018	Lactobacillus iners; VA15_2004; AY526083	2367	0
a36c01	S001546235	uncultured Peptostreptococcus sp.; VE58A09; GQ179692	2595	0
a36c02	S001910616	Lactobacillus iners (T); type strain: CCUG 28746; Y16329	2761	0
a36c04	S001910616	Lactobacillus iners (T); type strain: CCUG 28746; Y16329	2785	0
a36c05	S001910616	Lactobacillus iners (T); type strain: CCUG 28746; Y16329	2718	0
a36c06	S000405651	Streptococcus mitis; ATCC 15914; AY281076	2712	0
a36c07	S001910616	Lactobacillus iners (T); type strain: CCUG 28746; Y16329	2527	0
a36c08	S001910616	Lactobacillus iners (T); type strain: CCUG 28746; Y16329	2777	0
a36c09	S001910616	Lactobacillus iners (T); type strain: CCUG 28746; Y16329	2753	0
a36c10	S001910616	Lactobacillus iners (T); type strain: CCUG 28746; Y16329	2785	0
a36c11	S001910616	Lactobacillus iners (T); type strain: CCUG 28746; Y16329	2753	0
a36c12	S001910616	Lactobacillus iners (T); type strain: CCUG 28746; Y16329	2761	0
a36d02	S001910616	Lactobacillus iners (T); type strain: CCUG 28746; Y16329	2761	0
a36d03	S001910616	Lactobacillus iners (T); type strain: CCUG 28746; Y16329	2746	0
a36d04	S001910616	Lactobacillus iners (T); type strain: CCUG 28746; Y16329	2738	0
a36d06	S001910616	Lactobacillus iners (T); type strain: CCUG 28746; Y16329	2454	0
a36d07	S001910616	Lactobacillus iners (T); type strain: CCUG 28746; Y16329	2738	0
a36d08	S001910616	Lactobacillus iners (T); type strain: CCUG 28746; Y16329	2761	0
a36d09	S000944447	uncultured Streptococcus sp.; 102H10(oral); AM420009	2674	0
a36d11	S001910616	Lactobacillus iners (T); type strain: CCUG 28746; Y16329	2746	0
a36d12	S001910616	Lactobacillus iners (T); type strain: CCUG 28746; Y16329	2785	0
a36e02	S001910616	Lactobacillus iners (T); type strain: CCUG 28746; Y16329	2755	0
a36e03	S001910616	Lactobacillus iners (T); type strain: CCUG 28746; Y16329	2718	0
a36e04	S001910616	Lactobacillus iners (T); type strain: CCUG 28746; Y16329	2785	0
a36e06	S001910616	Lactobacillus iners (T); type strain: CCUG 28746; Y16329	2761	0
a36e07	S001910616	Lactobacillus iners (T); type strain: CCUG 28746; Y16329	2635	0
a36e08	S001910616	Lactobacillus iners (T); type strain: CCUG 28746; Y16329	2785	0
a36e10	S001910616	Lactobacillus iners (T); type strain: CCUG 28746; Y16329	2761	0
a36e11	S001910616	Lactobacillus iners (T); type strain: CCUG 28746; Y16329	2706	0
a36e12	S001910616	Lactobacillus iners (T); type strain: CCUG 28746; Y16329	2753	0
a36f01	S001793020	Rothia mucilaginosa DY-18; AP011540	2680	0
a36f02	S000652886	Methylobacterium sp. OS-16.b; AM237344	2595	0
a36f03	S001254159	uncultured Clostridium sp.; A05-10B; FJ542861	2214	0
a36f04	S001910616	Lactobacillus iners (T); type strain: CCUG 28746; Y16329	2708	0
a36f07	S000944447	uncultured Streptococcus sp.; 102H10(oral); AM420009	2454	0
a36f08	S001910616	Lactobacillus iners (T); type strain: CCUG 28746; Y16329	2718	0
a36f09	S001910616	Lactobacillus iners (T); type strain: CCUG 28746; Y16329	2613	0
a36f10	S001910616	Lactobacillus iners (T); type strain: CCUG 28746; Y16329	2761	0
a36f11	S001910616	Lactobacillus iners (T); type strain: CCUG 28746; Y16329	2746	0
a36f12	S000412018	Lactobacillus iners; VA15_2004; AY526083	2369	0
a36g01	S000412018	Lactobacillus iners; VA15_2004; AY526083	2583	0
a36g02	S001910616	Lactobacillus iners (T); type strain: CCUG 28746; Y16329	2777	0
a36g04	S001910616	Lactobacillus iners (T); type strain: CCUG 28746; Y16329	2730	0
a36g05	S001546262	uncultured Gardnerella sp.; VE1A04; GQ179719	2533	0
a36g06	S001910616	Lactobacillus iners (T); type strain: CCUG 28746; Y16329	2761	0
a36g07	S001910616	Lactobacillus iners (T); type strain: CCUG 28746; Y16329	2587	0
a36g08	S001910616	Lactobacillus iners (T); type strain: CCUG 28746; Y16329	2502	0
a36g09	S001910616	Lactobacillus iners (T); type strain: CCUG 28746; Y16329	2694	0
a36g10	S001910616	Lactobacillus iners (T); type strain: CCUG 28746; Y16329	2228	0
a36g11	S001910616	Lactobacillus iners (T); type strain: CCUG 28746; Y16329	2714	0
a36h01	S001910616	Lactobacillus iners (T); type strain: CCUG 28746; Y16329	2753	0
a36h02	S001910616	Lactobacillus iners (T); type strain: CCUG 28746; Y16329	2777	0
a36h03	S001910616	Lactobacillus iners (T); type strain: CCUG 28746; Y16329	2753	0
a36h04	S001910616	Lactobacillus iners (T); type strain: CCUG 28746; Y16329	2658	0
a36h05	S001872672	Gardnerella vaginalis 409-05; CP001849	2583	0
a36h06	S000979018	Sporolactobacillus inulinus; NBRC 13595; AB374521	1366	0
a36h07	S001910616	Lactobacillus iners (T); type strain: CCUG 28746; Y16329	2696	0
a36h09	S001872672	Gardnerella vaginalis 409-05; CP001849	2615	0
a36h11	S001910616	Lactobacillus iners (T); type strain: CCUG 28746; Y16329	2706	0
a15g06	S001589410	Anaerococcus tetradius; F0127; GQ422749	2298	0
a13a01	S001589410	Anaerococcus tetradius; F0127; GQ422749	2192	0
a13a03	S001589410	Anaerococcus tetradius; F0127; GQ422749	2200	0
a13a04	S000450504	Leptotrichia amnionii; AY489565	2621	0
a13a05	S000391613	Atopobium vaginae; VA14183_00; AF325325	2619	0
a13a06	S001558877	uncultured Prevotella sp.; 3641; FJ976215	2607	0
a13a07	S000404352	Veillonella montpellierensis; 2001-112662; AY244769	2674	0
a13a08	S000944447	uncultured Streptococcus sp.; 102H10(oral); AM420009	2561	0
a13a10	S001589410	Anaerococcus tetradius; F0127; GQ422749	2032	0
a13a12	S001589410	Anaerococcus tetradius; F0127; GQ422749	2307	0
a13b01	S001589410	Anaerococcus tetradius; F0127; GQ422749	2302	0
a13b02	S000450504	Leptotrichia amnionii; AY489565	2629	0
a13b03	S001589410	Anaerococcus tetradius; F0127; GQ422749	2266	0
a13b04	S001589410	Anaerococcus tetradius; F0127; GQ422749	2179	0
a13b05	S001546236	uncultured Gemella sp.; VE30A10; GQ179693	2462	0
a13b06	S000944447	uncultured Streptococcus sp.; 102H10(oral); AM420009	2666	0
a13b07	S001589410	Anaerococcus tetradius; F0127; GQ422749	2276	0
a13b08	S000944427	uncultured Prevotella sp.; 102C07(oral); AM419989	2666	0
a13b09	S001589410	Anaerococcus tetradius; F0127; GQ422749	2282	0
a13b10	S001589410	Anaerococcus tetradius; F0127; GQ422749	2290	0
a13c01	S000404352	Veillonella montpellierensis; 2001-112662; AY244769	2732	0
a13c02	S000944447	uncultured Streptococcus sp.; 102H10(oral); AM420009	2674	0
a13c04	S001088799	uncultured Prevotella sp.; 099B; EU644456	2746	0
a13c05	S001187424	Ureaplasma urealyticum serovar 10 str. ATCC 33699;	2639	0
a13c07	S001589410	Anaerococcus tetradius; F0127; GQ422749	2266	0
a13c08	S000450504	Leptotrichia amnionii; AY489565	2642	0
a13c09	S001589410	Anaerococcus tetradius; F0127; GQ422749	2290	0
a13c10	S000128467	Corynebacterium tuberculostearicum (T); CIP107291;	2611	0
a13c11	S001088799	uncultured Prevotella sp.; 099B; EU644456	2706	0
a13c12	S000744818	uncultured beta proteobacterium; XME18; EF061949	2692	0
a13d01	S001088799	uncultured Prevotella sp.; 099B; EU644456	2684	0
a13d02	S001589410	Anaerococcus tetradius; F0127; GQ422749	2305	0
a13d03	S001088799	uncultured Prevotella sp.; 099B; EU644456	2547	0
a13d04	S001589410	Anaerococcus tetradius; F0127; GQ422749	2305	0
a13d05	S000404352	Veillonella montpellierensis; 2001-112662; AY244769	2690	0
a13d06	S001589410	Anaerococcus tetradius; F0127; GQ422749	2212	0
a13d07	S001589410	Anaerococcus tetradius; F0127; GQ422749	2262	0
a13d08	S000404352	Veillonella montpellierensis; 2001-112662; AY244769	1618	0
a13d09	S001546236	uncultured Gemella sp.; VE30A10; GQ179693	2700	0
a13d10	S001589410	Anaerococcus tetradius; F0127; GQ422749	2329	0
a13d11	S001744707	Streptococcus mitis; KCOM 1379; GU045389	2680	0
a13d12	S001589410	Anaerococcus tetradius; F0127; GQ422749	2173	0
a13e01	S001572969	Escherichia coli BL21(DE3); CP001665	2367	0
a13e02	S000391613	Atopobium vaginae; VA14183_00; AF325325	2579	0
a13e03	S000404352	Veillonella montpellierensis; 2001-112662; AY244769	2682	0
a13e04	S001589410	Anaerococcus tetradius; F0127; GQ422749	2321	0
a13e05	S001088799	uncultured Prevotella sp.; 099B; EU644456	2714	0
a13e06	S001589410	Anaerococcus tetradius; F0127; GQ422749	2252	0
a13e07	S001088799	uncultured Prevotella sp.; 099B; EU644456	2690	0
a13e08	S001744707	Streptococcus mitis; KCOM 1379; GU045389	2633	0
a13e09	S000391613	Atopobium vaginae; VA14183_00; AF325325	2595	0
a13e10	S001546236	uncultured Gemella sp.; VE30A10; GQ179693	2692	0
a13e11	S001589410	Anaerococcus tetradius; F0127; GQ422749	2313	0
a13e12	S000944447	uncultured Streptococcus sp.; 102H10(oral); AM420009	2617	0
a13f01	S001589410	Anaerococcus tetradius; F0127; GQ422749	2274	0
a13f02	S001589410	Anaerococcus tetradius; F0127; GQ422749	2329	0
a13f03	S000944447	uncultured Streptococcus sp.; 102H10(oral); AM420009	2674	0
a13f04	S001546236	uncultured Gemella sp.; VE30A10; GQ179693	2708	0
a13f05	S000391613	Atopobium vaginae; VA14183_00; AF325325	2640	0
a13f06	S001589410	Anaerococcus tetradius; F0127; GQ422749	2302	0
a13f07	S000944447	uncultured Streptococcus sp.; 102H10(oral); AM420009	2698	0
a13f08	S000404352	Veillonella montpellierensis; 2001-112662; AY244769	2698	0
a13f09	S001187424	Ureaplasma urealyticum serovar 10 str. ATCC 33699;	2692	0
a13f10	S000450504	Leptotrichia amnionii; AY489565	2335	0
a13g01	S001589410	Anaerococcus tetradius; F0127; GQ422749	2313	0
a13g02	S000609987	uncultured Eggerthella sp.; 123-f2 68; AY738656	1951	0
a13g03	S000404352	Veillonella montpellierensis; 2001-112662; AY244769	2462	0
a13g04	S000944427	uncultured Prevotella sp.; 102C07(oral); AM419989	2690	0
a13g05	S001744707	Streptococcus mitis; KCOM 1379; GU045389	2418	0
a13g06	S001589410	Anaerococcus tetradius; F0127; GQ422749	2278	0
a13g07	S001088799	uncultured Prevotella sp.; 099B; EU644456	2714	0
a13g08	S001589410	Anaerococcus tetradius; F0127; GQ422749	2305	0
a13g09	S001589410	Anaerococcus tetradius; F0127; GQ422749	2212	0
a13g10	S001088799	uncultured Prevotella sp.; 099B; EU644456	2714	0
a13g11	S001589410	Anaerococcus tetradius; F0127; GQ422749	2313	0
a13g12	S000450504	Leptotrichia amnionii; AY489565	2658	0
a13h01	S001548776	Escherichia coli BW2952; K-12; CP001396	2666	0
a13h02	S000391613	Atopobium vaginae; VA14183_00; AF325325	2627	0
a13h03	S001088799	uncultured Prevotella sp.; 099B; EU644456	2722	0
a13h04	S000944447	uncultured Streptococcus sp.; 102H10(oral); AM420009	2518	0
a13h05	S000450504	Leptotrichia amnionii; AY489565	2478	0
a13h06	S000944447	uncultured Streptococcus sp.; 102H10(oral); AM420009	2698	0
a13h07	S001589410	Anaerococcus tetradius; F0127; GQ422749	2307	0
a13h08	S000404352	Veillonella montpellierensis; 2001-112662; AY244769	2708	0
a13h09	S001589410	Anaerococcus tetradius; F0127; GQ422749	2268	0
a13h10	S000450504	Leptotrichia amnionii; AY489565	2627	0
a13h11	S001088799	uncultured Prevotella sp.; 099B; EU644456	2682	0
a14a01	S000404352	Veillonella montpellierensis; 2001-112662; AY244769	2652	0
a14a02	S001589410	Anaerococcus tetradius; F0127; GQ422749	2220	0
a14a03	S000405651	Streptococcus mitis; ATCC 15914; AY281076	2623	0
a14a04	S001589410	Anaerococcus tetradius; F0127; GQ422749	2169	0
a14a05	S000008478	Corynebacterium sp.; CDC G5911; X81904	2442	0
a14a06	S001088799	uncultured Prevotella sp.; 099B; EU644456	2696	0
a14a07	S001589410	Anaerococcus tetradius; F0127; GQ422749	2284	0
a14a08	S000008478	Corynebacterium sp.; CDC G5911; X81904	2524	0
a14a10	S000944447	uncultured Streptococcus sp.; 102H10(oral); AM420009	2355	0
a14a11	S000944447	uncultured Streptococcus sp.; 102H10(oral); AM420009	2670	0
a14a12	S001589410	Anaerococcus tetradius; F0127; GQ422749	2018	0
a14b01	S000008478	Corynebacterium sp.; CDC G5911; X81904	2553	0
a14b02	S000609987	uncultured Eggerthella sp.; 123-f2 68; AY738656	1949	0
a14b03	S001589410	Anaerococcus tetradius; F0127; GQ422749	2307	0
a14b04	S000944447	uncultured Streptococcus sp.; 102H10(oral); AM420009	2674	0
a14b05	S001589410	Anaerococcus tetradius; F0127; GQ422749	2321	0
a14b06	S000965282	Delftia acidovorans SPH-1; CP000884	2676	0
a14b08	S001449610	uncultured Staphylococcaceae bacterium; B14; FJ999596	2535	0
a14b09	S001546236	uncultured Gemella sp.; VE30A10; GQ179693	2708	0
a14b10	S001589410	Anaerococcus tetradius; F0127; GQ422749	2268	0
a14b11	S000404352	Veillonella montpellierensis; 2001-112662; AY244769	2753	0
a14b12	S001589410	Anaerococcus tetradius; F0127; GQ422749	2305	0
a14c01	S000609987	uncultured Eggerthella sp.; 123-f2 68; AY738656	1974	0
a14c02	S001589410	Anaerococcus tetradius; F0127; GQ422749	2228	0
a14c03	S000944427	uncultured Prevotella sp.; 102C07(oral); AM419989	2652	0
a14c04	S001546236	uncultured Gemella sp.; VE30A10; GQ179693	2684	0
a14c05	S001589410	Anaerococcus tetradius; F0127; GQ422749	2313	0
a14c06	S000450504	Leptotrichia amnionii; AY489565	2619	0
a14c07	S001589410	Anaerococcus tetradius; F0127; GQ422749	2290	0
a14c08	S000450504	Leptotrichia amnionii; AY489565	2613	0
a14c10	S000130866	Corynebacterium tuberculostearicum; CIP107067; AJ438051	2712	0
a14c11	S000404352	Veillonella montpellierensis; 2001-112662; AY244769	2377	0
a14c12	S000944427	uncultured Prevotella sp.; 102C07(oral); AM419989	2676	0
a14d01	S000450504	Leptotrichia amnionii; AY489565	2581	0
a14d02	S000404352	Veillonella montpellierensis; 2001-112662; AY244769	2704	0
a14d03	S001088807	uncultured Fusobacterium sp.; 385; EU644464	2682	0
a14d04	S001589410	Anaerococcus tetradius; F0127; GQ422749	2290	0
a14d05	S001187424	Ureaplasma urealyticum serovar 10 str. ATCC 33699;	2601	0
a14d06	S001744707	Streptococcus mitis; KCOM 1379; GU045389	2648	0
a14d07	S000404352	Veillonella montpellierensis; 2001-112662; AY244769	2698	0
a14d08	S001546236	uncultured Gemella sp.; VE30A10; GQ179693	2686	0
a14d09	S001187424	Ureaplasma urealyticum serovar 10 str. ATCC 33699;	2670	0
a14d10	S001744707	Streptococcus mitis; KCOM 1379; GU045389	2694	0
a14d11	S001589410	Anaerococcus tetradius; F0127; GQ422749	2313	0
a14d12	S000944427	uncultured Prevotella sp.; 102C07(oral); AM419989	2674	0
a14e01	S000404352	Veillonella montpellierensis; 2001-112662; AY244769	2740	0
a14e03	S000404352	Veillonella montpellierensis; 2001-112662; AY244769	2579	0
a14e04	S000944447	uncultured Streptococcus sp.; 102H10(oral); AM420009	2652	0
a14e05	S000404352	Veillonella montpellierensis; 2001-112662; AY244769	2744	0
a14e06	S000450504	Leptotrichia amnionii; AY489565	2650	0
a14e07	S000404352	Veillonella montpellierensis; 2001-112662; AY244769	2712	0
a14e09	S000404352	Veillonella montpellierensis; 2001-112662; AY244769	2728	0
a14e10	S001589410	Anaerococcus tetradius; F0127; GQ422749	2329	0
a14e11	S000391613	Atopobium vaginae; VA14183_00; AF325325	2664	0
a14e12	S001589410	Anaerococcus tetradius; F0127; GQ422749	2305	0
a14f01	S001088799	uncultured Prevotella sp.; 099B; EU644456	2694	0
a14f02	S000404352	Veillonella montpellierensis; 2001-112662; AY244769	2712	0
a14f03	S001589410	Anaerococcus tetradius; F0127; GQ422749	2234	0
a14f04	S001187422	Ureaplasma urealyticum serovar 10 str. ATCC 33699;	2631	0
a14f05	S000546840	Prevotella melaninogenica (T); ATCC 25845; AY323525	2533	0
a14f06	S001872672	Gardnerella vaginalis 409-05; CP001849	2650	0
a14f07	S000944447	uncultured Streptococcus sp.; 102H10(oral); AM420009	2621	0
a14f08	S001088799	uncultured Prevotella sp.; 099B; EU644456	2738	0
a14f09	S000450504	Leptotrichia amnionii; AY489565	2593	0
a14f10	S000944447	uncultured Streptococcus sp.; 102H10(oral); AM420009	2666	0
a14f11	S001546229	uncultured Fusobacterium sp.; VE32H03; GQ179686	2565	0
a14f12	S000944447	uncultured Streptococcus sp.; 102H10(oral); AM420009	2660	0
a14g01	S000404352	Veillonella montpellierensis; 2001-112662; AY244769	2752	0
a14g02	S001088799	uncultured Prevotella sp.; 099B; EU644456	2714	0
a14g03	S000944447	uncultured Streptococcus sp.; 102H10(oral); AM420009	2621	0
a14g04	S001589410	Anaerococcus tetradius; F0127; GQ422749	2260	0
a14g05	S001088799	uncultured Prevotella sp.; 099B; EU644456	2700	0
a14g06	S001589410	Anaerococcus tetradius; F0127; GQ422749	2250	0
a14g07	S001744707	Streptococcus mitis; KCOM 1379; GU045389	2656	0
a14g08	S001589410	Anaerococcus tetradius; F0127; GQ422749	2298	0
a14g09	S001546236	uncultured Gemella sp.; VE30A10; GQ179693	2668	0
a14g10	S000404352	Veillonella montpellierensis; 2001-112662; AY244769	2752	0
a14g11	S000391613	Atopobium vaginae; VA14183_00; AF325325	2648	0
a14g12	S001187422	Ureaplasma urealyticum serovar 10 str. ATCC 33699;	2700	0
a14h01	S000944447	uncultured Streptococcus sp.; 102H10(oral); AM420009	2682	0
a14h02	S001589410	Anaerococcus tetradius; F0127; GQ422749	2337	0
a14h03	S000391613	Atopobium vaginae; VA14183_00; AF325325	2545	0
a14h04	S001610969	Escherichia coli DH1; CP001637	2601	0
a14h05	S001187422	Ureaplasma urealyticum serovar 10 str. ATCC 33699;	2478	0
a14h06	S001744707	Streptococcus mitis; KCOM 1379; GU045389	2702	0
a14h07	S000404352	Veillonella montpellierensis; 2001-112662; AY244769	2759	0
a14h08	S000944447	uncultured Streptococcus sp.; 102H10(oral); AM420009	2654	0
a14h09	S001187422	Ureaplasma urealyticum serovar 10 str. ATCC 33699;	2652	0
a14h10	S001872672	Gardnerella vaginalis 409-05; CP001849	2672	0
a14h11	S000404352	Veillonella montpellierensis; 2001-112662; AY244769	2767	0
a14h12	S000944447	uncultured Streptococcus sp.; 102H10(oral); AM420009	2682	0
a15a01	S000260845	Corynebacterium pseudogenitalium; NCTC 11860; X81872	2484	0
a15a02	S001589410	Anaerococcus tetradius; F0127; GQ422749	2187	0
a15a03	S001589410	Anaerococcus tetradius; F0127; GQ422749	2228	0
a15a04	S000391613	Atopobium vaginae; VA14183_00; AF325325	2642	0
a15a05	S001546236	uncultured Gemella sp.; VE30A10; GQ179693	2648	0
a15a06	S001589410	Anaerococcus tetradius; F0127; GQ422749	2230	0
a15a07	S001589410	Anaerococcus tetradius; F0127; GQ422749	2240	0
a15a08	S001546257	uncultured Ureaplasma sp.; VE12C09; GQ179714	2619	0
a15a09	S001589410	Anaerococcus tetradius; F0127; GQ422749	2141	0
a15a10	S001744707	Streptococcus mitis; KCOM 1379; GU045389	2496	0
a15a12	S000944427	uncultured Prevotella sp.; 102C07(oral); AM419989	2682	0
a15b01	S000404352	Veillonella montpellierensis; 2001-112662; AY244769	2767	0
a15b02	S001589410	Anaerococcus tetradius; F0127; GQ422749	2305	0
a15b03	S001589410	Anaerococcus tetradius; F0127; GQ422749	2298	0
a15b04	S000404352	Veillonella montpellierensis; 2001-112662; AY244769	2698	0
a15b05	S001589410	Anaerococcus tetradius; F0127; GQ422749	2282	0
a15b06	S000404352	Veillonella montpellierensis; 2001-112662; AY244769	2761	0
a15b07	S001589410	Anaerococcus tetradius; F0127; GQ422749	2258	0
a15b08	S001088824	uncultured Sneathia sp.; 301; EU644481	2609	0
a15b09	S000450504	Leptotrichia amnionii; AY489565	2635	0
a15b10	S001546236	uncultured Gemella sp.; VE30A10; GQ179693	2652	0
a15b12	S000944447	uncultured Streptococcus sp.; 102H10(oral); AM420009	2524	0
a15c01	S001088824	uncultured Sneathia sp.; 301; EU644481	2621	0
a15c02	S001546236	uncultured Gemella sp.; VE30A10; GQ179693	2708	0
a15c03	S001088799	uncultured Prevotella sp.; 099B; EU644456	2738	0
a15c04	S001589410	Anaerococcus tetradius; F0127; GQ422749	2321	0
a15c05	S001088799	uncultured Prevotella sp.; 099B; EU644456	2710	0
a15c06	S000404352	Veillonella montpellierensis; 2001-112662; AY244769	2744	0
a15c07	S000404352	Veillonella montpellierensis; 2001-112662; AY244769	2752	0
a15c08	S000944427	uncultured Prevotella sp.; 102C07(oral); AM419989	2698	0
a15c09	S000450504	Leptotrichia amnionii; AY489565	2658	0
a15c11	S000404352	Veillonella montpellierensis; 2001-112662; AY244769	2752	0
a15c12	S000944447	uncultured Streptococcus sp.; 102H10(oral); AM420009	2690	0
a15d01	S000944447	uncultured Streptococcus sp.; 102H10(oral); AM420009	2646	0
a15d02	S001589410	Anaerococcus tetradius; F0127; GQ422749	2298	0
a15d03	S000391613	Atopobium vaginae; VA14183_00; AF325325	2593	0
a15d04	S001589410	Anaerococcus tetradius; F0127; GQ422749	2313	0
a15d05	S000404352	Veillonella montpellierensis; 2001-112662; AY244769	2736	0
a15d06	S000404352	Veillonella montpellierensis; 2001-112662; AY244769	2775	0
a15d07	S000404352	Veillonella montpellierensis; 2001-112662; AY244769	2524	0
a15d08	S000404352	Veillonella montpellierensis; 2001-112662; AY244769	2722	0
a15d09	S001088799	uncultured Prevotella sp.; 099B; EU644456	2684	0
a15d10	S000404352	Veillonella montpellierensis; 2001-112662; AY244769	2775	0
a15d11	S001088799	uncultured Prevotella sp.; 099B; EU644456	2722	0
a15d12	S000404352	Veillonella montpellierensis; 2001-112662; AY244769	2670	0
a15e01	S001589410	Anaerococcus tetradius; F0127; GQ422749	2284	0
a15e02	S001589410	Anaerococcus tetradius; F0127; GQ422749	2313	0
a15e03	S000404352	Veillonella montpellierensis; 2001-112662; AY244769	2767	0
a15e04	S000701293	Pedobacter rhizospharae; type strain: 01-96; AM279214	2411	0
a15e05	S000944427	uncultured Prevotella sp.; 102C07(oral); AM419989	2674	0
a15e06	S000404352	Veillonella montpellierensis; 2001-112662; AY244769	2728	0
a15e07	S001612438	Fusobacterium nucleatum subsp. animalis; 708; GQ496163	2642	0
a15e08	S001589410	Anaerococcus tetradius; F0127; GQ422749	2305	0
a15e09	S000404352	Veillonella montpellierensis; 2001-112662; AY244769	2775	0
a15e10	S001872672	Gardnerella vaginalis 409-05; CP001849	2688	0
a15e11	S000404352	Veillonella montpellierensis; 2001-112662; AY244769	2759	0
a15e12	S000404352	Veillonella montpellierensis; 2001-112662; AY244769	2759	0
a15f01	S001589410	Anaerococcus tetradius; F0127; GQ422749	2236	0
a15f02	S001589410	Anaerococcus tetradius; F0127; GQ422749	2313	0
a15f03	S000450504	Leptotrichia amnionii; AY489565	2642	0
a15f04	S000609987	uncultured Eggerthella sp.; 123-f2 68; AY738656	1959	0
a15f05	S001589410	Anaerococcus tetradius; F0127; GQ422749	2147	0
a15f06	S000391613	Atopobium vaginae; VA14183_00; AF325325	2633	0
a15f07	S001589410	Anaerococcus tetradius; F0127; GQ422749	2313	0
a15f09	S000404352	Veillonella montpellierensis; 2001-112662; AY244769	2752	0
a15f10	S000404352	Veillonella montpellierensis; 2001-112662; AY244769	2753	0
a15f11	S000391613	Atopobium vaginae; VA14183_00; AF325325	2656	0
a15f12	S001589410	Anaerococcus tetradius; F0127; GQ422749	2321	0
a15g01	S000404352	Veillonella montpellierensis; 2001-112662; AY244769	2728	0
a15g03	S000450504	Leptotrichia amnionii; AY489565	2631	0
a15g04	S001589410	Anaerococcus tetradius; F0127; GQ422749	2300	0
a15g05	S001589410	Anaerococcus tetradius; F0127; GQ422749	2290	0
a15g07	S000391613	Atopobium vaginae; VA14183_00; AF325325	2625	0
a15g08	S001088799	uncultured Prevotella sp.; 099B; EU644456	2722	0
a15g09	S001589410	Anaerococcus tetradius; F0127; GQ422749	2313	0
a15g10	S000391613	Atopobium vaginae; VA14183_00; AF325325	2640	0
a15g11	S001589410	Anaerococcus tetradius; F0127; GQ422749	2242	0
a15g12	S000944427	uncultured Prevotella sp.; 102C07(oral); AM419989	2642	0
a15h01	S000391613	Atopobium vaginae; VA14183_00; AF325325	2640	0
a15h02	S001589410	Anaerococcus tetradius; F0127; GQ422749	2305	0
a15h03	S000944447	uncultured Streptococcus sp.; 102H10(oral); AM420009	2706	0
a15h04	S001589410	Anaerococcus tetradius; F0127; GQ422749	2313	0
a15h05	S001546236	uncultured Gemella sp.; VE30A10; GQ179693	2692	0
a15h06	S000404352	Veillonella montpellierensis; 2001-112662; AY244769	2716	0
a15h07	S001546236	uncultured Gemella sp.; VE30A10; GQ179693	2650	0
a15h08	S001187424	Ureaplasma urealyticum serovar 10 str. ATCC 33699;	2613	0
a15h09	S000404352	Veillonella montpellierensis; 2001-112662; AY244769	2720	0
a15h10	S000944447	uncultured Streptococcus sp.; 102H10(oral); AM420009	2690	0
a15h11	S001088824	uncultured Sneathia sp.; 301; EU644481	2676	0
a15h12	S000944427	uncultured Prevotella sp.; 102C07(oral); AM419989	2674	0
a16a02	S001088799	uncultured Prevotella sp.; 099B; EU644456	2353	0
a16a04	S001589410	Anaerococcus tetradius; F0127; GQ422749	2284	0
a16a05	S000944427	uncultured Prevotella sp.; 102C07(oral); AM419989	2682	0
a16a08	S000008478	Corynebacterium sp.; CDC G5911; X81904	2553	0
a16a11	S001546236	uncultured Gemella sp.; VE30A10; GQ179693	2595	0
a16a12	S000404352	Veillonella montpellierensis; 2001-112662; AY244769	2561	0
a16b01	S000450504	Leptotrichia amnionii; AY489565	2607	0
a16b02	S001546236	uncultured Gemella sp.; VE30A10; GQ179693	2700	0
a16b03	S001187424	Ureaplasma urealyticum serovar 10 str. ATCC 33699;	2660	0
a16b04	S000450504	Leptotrichia amnionii; AY489565	2559	0
a16b05	S001872672	Gardnerella vaginalis 409-05; CP001849	2650	0
a16b07	S000404352	Veillonella montpellierensis; 2001-112662; AY244769	2593	0
a16b08	S000391613	Atopobium vaginae; VA14183_00; AF325325	2619	0
a16b09	S001589410	Anaerococcus tetradius; F0127; GQ422749	2204	0
a16b10	S001589410	Anaerococcus tetradius; F0127; GQ422749	1741	0
a16c01	S000391613	Atopobium vaginae; VA14183_00; AF325325	2656	0
a16c02	S001187422	Ureaplasma urealyticum serovar 10 str. ATCC 33699;	2676	0
a16c03	S001744707	Streptococcus mitis; KCOM 1379; GU045389	2543	0
a16c04	S001546236	uncultured Gemella sp.; VE30A10; GQ179693	2700	0
a16c05	S000404352	Veillonella montpellierensis; 2001-112662; AY244769	2609	0
a16c06	S001589410	Anaerococcus tetradius; F0127; GQ422749	2305	0
a16c07	S001589410	Anaerococcus tetradius; F0127; GQ422749	2226	0
a16c08	S001589410	Anaerococcus tetradius; F0127; GQ422749	2313	0
a16c09	S001589410	Anaerococcus tetradius; F0127; GQ422749	2246	0
a16c10	S000944447	uncultured Streptococcus sp.; 102H10(oral); AM420009	2698	0
a16c11	S001589410	Anaerococcus tetradius; F0127; GQ422749	2198	0
a16c12	S001088799	uncultured Prevotella sp.; 099B; EU644456	2730	0
a16d01	S000404352	Veillonella montpellierensis; 2001-112662; AY244769	2700	0
a16d02	S001589410	Anaerococcus tetradius; F0127; GQ422749	2133	0
a16d03	S001589410	Anaerococcus tetradius; F0127; GQ422749	2260	0
a16d04	S001546236	uncultured Gemella sp.; VE30A10; GQ179693	2652	0
a16d05	S000391613	Atopobium vaginae; VA14183_00; AF325325	2640	0
a16d06	S000944447	uncultured Streptococcus sp.; 102H10(oral); AM420009	2674	0
a16d07	S000944447	uncultured Streptococcus sp.; 102H10(oral); AM420009	2666	0
a16d08	S001546236	uncultured Gemella sp.; VE30A10; GQ179693	2692	0
a16d09	S000944427	uncultured Prevotella sp.; 102C07(oral); AM419989	2639	0
a16d10	S000944447	uncultured Streptococcus sp.; 102H10(oral); AM420009	2714	0
a16d11	S000404352	Veillonella montpellierensis; 2001-112662; AY244769	2752	0
a16d12	S001589410	Anaerococcus tetradius; F0127; GQ422749	2157	0
a16e01	S000404352	Veillonella montpellierensis; 2001-112662; AY244769	2692	0
a16e02	S000404352	Veillonella montpellierensis; 2001-112662; AY244769	2775	0
a16e03	S001589410	Anaerococcus tetradius; F0127; GQ422749	2105	0
a16e05	S001589410	Anaerococcus tetradius; F0127; GQ422749	2282	0
a16e06	S000391613	Atopobium vaginae; VA14183_00; AF325325	2617	0
a16e07	S000391613	Atopobium vaginae; VA14183_00; AF325325	2640	0
a16e08	S000944447	uncultured Streptococcus sp.; 102H10(oral); AM420009	2658	0
a16e09	S000404352	Veillonella montpellierensis; 2001-112662; AY244769	2712	0
a16e10	S001589410	Anaerococcus tetradius; F0127; GQ422749	2290	0
a16e11	S000450504	Leptotrichia amnionii; AY489565	2407	0
a16f01	S000404352	Veillonella montpellierensis; 2001-112662; AY244769	2734	0
a16f02	S001088799	uncultured Prevotella sp.; 099B; EU644456	2650	0
a16f03	S000404352	Veillonella montpellierensis; 2001-112662; AY244769	2720	0
a16f04	S001589410	Anaerococcus tetradius; F0127; GQ422749	2292	0
a16f05	S001589410	Anaerococcus tetradius; F0127; GQ422749	2321	0
a16f06	S001589410	Anaerococcus tetradius; F0127; GQ422749	2313	0
a16f07	S001187424	Ureaplasma urealyticum serovar 10 str. ATCC 33699;	2639	0
a16f08	S001589410	Anaerococcus tetradius; F0127; GQ422749	2305	0
a16f09	S001872672	Gardnerella vaginalis 409-05; CP001849	2672	0
a16f10	S000450504	Leptotrichia amnionii; AY489565	2587	0
a16f11	S001589410	Anaerococcus tetradius; F0127; GQ422749	2290	0
a16f12	S001589410	Anaerococcus tetradius; F0127; GQ422749	2292	0
a16g02	S000404352	Veillonella montpellierensis; 2001-112662; AY244769	2514	0
a16g03	S000450504	Leptotrichia amnionii; AY489565	2627	0
a16g04	S000404352	Veillonella montpellierensis; 2001-112662; AY244769	2775	0
a16g05	S001088824	uncultured Sneathia sp.; 301; EU644481	2629	0
a16g06	S000944427	uncultured Prevotella sp.; 102C07(oral); AM419989	2666	0
a16g07	S000404352	Veillonella montpellierensis; 2001-112662; AY244769	2759	0
a16g08	S001872672	Gardnerella vaginalis 409-05; CP001849	2656	0
a16g09	S000391613	Atopobium vaginae; VA14183_00; AF325325	2529	0
a16g10	S000391613	Atopobium vaginae; VA14183_00; AF325325	2656	0
a16g11	S001546236	uncultured Gemella sp.; VE30A10; GQ179693	2660	0
a16g12	S001589410	Anaerococcus tetradius; F0127; GQ422749	2305	0
a16h01	S001187424	Ureaplasma urealyticum serovar 10 str. ATCC 33699;	2642	0
a16h02	S001589410	Anaerococcus tetradius; F0127; GQ422749	2313	0
a16h03	S001589410	Anaerococcus tetradius; F0127; GQ422749	2258	0
a16h04	S000944447	uncultured Streptococcus sp.; 102H10(oral); AM420009	2698	0
a16h05	S000450504	Leptotrichia amnionii; AY489565	2658	0
a16h06	S001589410	Anaerococcus tetradius; F0127; GQ422749	2292	0
a16h07	S001589410	Anaerococcus tetradius; F0127; GQ422749	2280	0
a16h08	S001589410	Anaerococcus tetradius; F0127; GQ422749	2290	0
a16h09	S001088799	uncultured Prevotella sp.; 099B; EU644456	2662	0
a16h10	S000404352	Veillonella montpellierensis; 2001-112662; AY244769	2759	0
a16h11	S001744707	Streptococcus mitis; KCOM 1379; GU045389	2702	0
a16h12	S001589410	Anaerococcus tetradius; F0127; GQ422749	2282	0
a59a11	S001546281	uncultured Prevotella sp.; VE12H08; GQ179738	2436	0
a59c10	S000404352	Veillonella montpellierensis; 2001-112662; AY244769	2759	0
a57a09	S001546236	uncultured Gemella sp.; VE30A10; GQ179693	2391	0
a57a11	S001910616	Lactobacillus iners (T); type strain: CCUG 28746; Y16329	2506	0
a57b01	S000404352	Veillonella montpellierensis; 2001-112662; AY244769	2712	0
a57b02	S001546236	uncultured Gemella sp.; VE30A10; GQ179693	2424	0
a57b03	S001088824	uncultured Sneathia sp.; 301; EU644481	2648	0
a57b05	S001088824	uncultured Sneathia sp.; 301; EU644481	2654	0
a57b06	S001088824	uncultured Sneathia sp.; 301; EU644481	2652	0
a57b07	S001088824	uncultured Sneathia sp.; 301; EU644481	2601	0
a57b09	S000404352	Veillonella montpellierensis; 2001-112662; AY244769	2668	0
a57c04	S001088824	uncultured Sneathia sp.; 301; EU644481	2619	0
a57c05	S001792989	Propionibacterium acnes; JCM 6425; AB538431	2640	0
a57c06	S001546281	uncultured Prevotella sp.; VE12H08; GQ179738	2656	0
a57c07	S001546232	uncultured Dialister sp.; VE58E12; GQ179689	2401	0
a57c08	S001088824	uncultured Sneathia sp.; 301; EU644481	2662	0
a57c09	S001546236	uncultured Gemella sp.; VE30A10; GQ179693	2474	0
a57c10	S001088822	uncultured Sneathia sp.; 230; EU644479	2684	0
a57d01	S000404352	Veillonella montpellierensis; 2001-112662; AY244769	2605	0
a57d02	S001045903	Escherichia coli; HDDMG05; EU723821	1501	0
a57d03	S001088824	uncultured Sneathia sp.; 301; EU644481	2670	0
a57d04	S001546236	uncultured Gemella sp.; VE30A10; GQ179693	2684	0
a57d05	S001546281	uncultured Prevotella sp.; VE12H08; GQ179738	2508	0
a57d07	S000404352	Veillonella montpellierensis; 2001-112662; AY244769	2688	0
a57d08	S000404352	Veillonella montpellierensis; 2001-112662; AY244769	2736	0
a57d09	S001744223	Mycoplasma hominis; PG21; FP236530	2692	0
a57d10	S001088822	uncultured Sneathia sp.; 230; EU644479	2660	0
a57d11	S001088824	uncultured Sneathia sp.; 301; EU644481	2676	0
a57d12	S001088824	uncultured Sneathia sp.; 301; EU644481	2662	0
a57e01	S001546236	uncultured Gemella sp.; VE30A10; GQ179693	2494	0
a57e02	S001546281	uncultured Prevotella sp.; VE12H08; GQ179738	2648	0
a57e03	S000404352	Veillonella montpellierensis; 2001-112662; AY244769	2214	0
a57e04	S001546236	uncultured Gemella sp.; VE30A10; GQ179693	2692	0
a57e06	S001546236	uncultured Gemella sp.; VE30A10; GQ179693	2252	0
a57e07	S001088824	uncultured Sneathia sp.; 301; EU644481	2640	0
a57e08	S001088824	uncultured Sneathia sp.; 301; EU644481	2684	0
a57e10	S001088824	uncultured Sneathia sp.; 301; EU644481	2676	0
a57e11	S001088824	uncultured Sneathia sp.; 301; EU644481	2644	0
a57f01	S001088824	uncultured Sneathia sp.; 301; EU644481	2670	0
a57f02	S001546281	uncultured Prevotella sp.; VE12H08; GQ179738	2656	0
a57f03	S001546281	uncultured Prevotella sp.; VE12H08; GQ179738	2640	0
a57f05	S001546281	uncultured Prevotella sp.; VE12H08; GQ179738	2640	0
a57f06	S001088824	uncultured Sneathia sp.; 301; EU644481	2508	0
a57f07	S001546236	uncultured Gemella sp.; VE30A10; GQ179693	2567	0
a57f08	S001265367	Yersinia kristensenii; Asd MY-1; FM955884	2736	0
a57f10	S001546281	uncultured Prevotella sp.; VE12H08; GQ179738	2625	0
a57f11	S001546232	uncultured Dialister sp.; VE58E12; GQ179689	2692	0
a57f12	S001910616	Lactobacillus iners (T); type strain: CCUG 28746; Y16329	2753	0
a57g01	S000404352	Veillonella montpellierensis; 2001-112662; AY244769	2752	0
a57g02	S001546236	uncultured Gemella sp.; VE30A10; GQ179693	2700	0
a57g03	S001546281	uncultured Prevotella sp.; VE12H08; GQ179738	2547	0
a57g04	S001546236	uncultured Gemella sp.; VE30A10; GQ179693	2405	0
a57g05	S000404352	Veillonella montpellierensis; 2001-112662; AY244769	2415	0
a57g06	S001546281	uncultured Prevotella sp.; VE12H08; GQ179738	2640	0
a57g07	S001546274	uncultured Aerococcus sp.; VE4G11; GQ179731	2650	0
a57g08	S001546281	uncultured Prevotella sp.; VE12H08; GQ179738	2611	0
a57g10	S000404352	Veillonella montpellierensis; 2001-112662; AY244769	2767	0
a57g11	S000404352	Veillonella montpellierensis; 2001-112662; AY244769	2680	0
a57g12	S001546232	uncultured Dialister sp.; VE58E12; GQ179689	2730	0
a57h01	S001546274	uncultured Aerococcus sp.; VE4G11; GQ179731	2672	0
a57h02	S001546236	uncultured Gemella sp.; VE30A10; GQ179693	2678	0
a57h03	S001546274	uncultured Aerococcus sp.; VE4G11; GQ179731	2385	0
a57h04	S001744223	Mycoplasma hominis; PG21; FP236530	2682	0
a57h05	S000404352	Veillonella montpellierensis; 2001-112662; AY244769	2692	0
a57h06	S000883490	uncultured proteobacterium; GASP-MA2W2_F07; EF663250	1183	0
a57h07	S001546274	uncultured Aerococcus sp.; VE4G11; GQ179731	2670	0
a57h08	S001546274	uncultured Aerococcus sp.; VE4G11; GQ179731	2640	0
a57h09	S001088824	uncultured Sneathia sp.; 301; EU644481	2670	0
a57h10	S000404352	Veillonella montpellierensis; 2001-112662; AY244769	2769	0
a57h12	S000404352	Veillonella montpellierensis; 2001-112662; AY244769	2767	0
a58a01	S001546236	uncultured Gemella sp.; VE30A10; GQ179693	2444	0
a58a08	S000404352	Veillonella montpellierensis; 2001-112662; AY244769	2488	0
a58b01	S001546281	uncultured Prevotella sp.; VE12H08; GQ179738	2595	0
a58b02	S001088824	uncultured Sneathia sp.; 301; EU644481	2460	0
a58b03	S000412018	Lactobacillus iners; VA15_2004; AY526083	2686	0
a58b04	S001088824	uncultured Sneathia sp.; 301; EU644481	2684	0
a58b05	S001744223	Mycoplasma hominis; PG21; FP236530	2714	0
a58b07	S001088824	uncultured Sneathia sp.; 301; EU644481	2676	0
a58b08	S001088824	uncultured Sneathia sp.; 301; EU644481	2676	0
a58b09	S001546236	uncultured Gemella sp.; VE30A10; GQ179693	2716	0
a58b10	S001546274	uncultured Aerococcus sp.; VE4G11; GQ179731	2585	0
a58b11	S000404352	Veillonella montpellierensis; 2001-112662; AY244769	2375	0
a58c01	S001088824	uncultured Sneathia sp.; 301; EU644481	2482	0
a58c02	S001744223	Mycoplasma hominis; PG21; FP236530	2678	0
a58c03	S001546236	uncultured Gemella sp.; VE30A10; GQ179693	2496	0
a58c05	S001088824	uncultured Sneathia sp.; 301; EU644481	2387	0
a58c06	S000404352	Veillonella montpellierensis; 2001-112662; AY244769	2280	0
a58c07	S001088824	uncultured Sneathia sp.; 301; EU644481	2652	0
a58c08	S001546274	uncultured Aerococcus sp.; VE4G11; GQ179731	2694	0
a58c09	S001088824	uncultured Sneathia sp.; 301; EU644481	2428	0
a58c10	S000404352	Veillonella montpellierensis; 2001-112662; AY244769	2676	0
a58c12	S000404352	Veillonella montpellierensis; 2001-112662; AY244769	2210	0
a58d01	S000013318	Aerococcus christensenii; CCUG 28826; Y17318	2127	0
a58d03	S000450504	Leptotrichia amnionii; AY489565	2615	0
a58d05	S000765352	uncultured Lachnospiraceae bacterium; MZH0805-50; EF120366	2644	0
a58d06	S001744223	Mycoplasma hominis; PG21; FP236530	2692	0
a58d07	S001546281	uncultured Prevotella sp.; VE12H08; GQ179738	2640	0
a58d08	S001088824	uncultured Sneathia sp.; 301; EU644481	2660	0
a58d09	S001088824	uncultured Sneathia sp.; 301; EU644481	2684	0
a58d10	S000404352	Veillonella montpellierensis; 2001-112662; AY244769	2718	0
a58d11	S001088824	uncultured Sneathia sp.; 301; EU644481	2660	0
a58d12	S001088824	uncultured Sneathia sp.; 301; EU644481	2672	0
a58e01	S001088824	uncultured Sneathia sp.; 301; EU644481	1673	0
a58e02	S001546274	uncultured Aerococcus sp.; VE4G11; GQ179731	2710	0
a58e03	S001546236	uncultured Gemella sp.; VE30A10; GQ179693	2599	0
a58e04	S001546281	uncultured Prevotella sp.; VE12H08; GQ179738	2383	0
a58e06	S001744223	Mycoplasma hominis; PG21; FP236530	2674	0
a58e07	S001546236	uncultured Gemella sp.; VE30A10; GQ179693	2646	0
a58e08	S001546236	uncultured Gemella sp.; VE30A10; GQ179693	2684	0
a58e09	S001088824	uncultured Sneathia sp.; 301; EU644481	2381	0
a58e10	S000682398	uncultured Lactobacillus sp.; FX4B1-7; AY995250	2315	0
a58f01	S000765344	uncultured Megasphaera sp.; MZH9600; EF120358	2740	0
a58f03	S001088824	uncultured Sneathia sp.; 301; EU644481	2668	0
a58f04	S001088824	uncultured Sneathia sp.; 301; EU644481	2644	0
a58f06	S001549312	Pseudomonas poae; LS172; FJ937922	2702	0
a58f07	S001088822	uncultured Sneathia sp.; 230; EU644479	2700	0
a58f08	S000395079	Veillonella montpellierensis (T); ADV 281.99; AF473836	2292	0
a58f09	S001088824	uncultured Sneathia sp.; 301; EU644481	2654	0
a58f10	S001546281	uncultured Prevotella sp.; VE12H08; GQ179738	2648	0
a58f11	S001088824	uncultured Sneathia sp.; 301; EU644481	2317	0
a58f12	S001546274	uncultured Aerococcus sp.; VE4G11; GQ179731	2670	0
a58g01	S000765352	uncultured Lachnospiraceae bacterium; MZH0805-50; EF120366	2674	0
a58g02	S001546236	uncultured Gemella sp.; VE30A10; GQ179693	2666	0
a58g03	S000404352	Veillonella montpellierensis; 2001-112662; AY244769	2300	0
a58g04	S000404352	Veillonella montpellierensis; 2001-112662; AY244769	2607	0
a58g05	S001546273	uncultured Sneathia sp.; VE12E10; GQ179730	2470	0
a58g06	S001546236	uncultured Gemella sp.; VE30A10; GQ179693	2611	0
a58g07	S000404352	Veillonella montpellierensis; 2001-112662; AY244769	2670	0
a58g08	S001546235	uncultured Peptostreptococcus sp.; VE58A09; GQ179692	2171	0
a58g10	S001546236	uncultured Gemella sp.; VE30A10; GQ179693	2654	0
a58g11	S001546281	uncultured Prevotella sp.; VE12H08; GQ179738	2648	0
a58g12	S000404352	Veillonella montpellierensis; 2001-112662; AY244769	2704	0
a58h01	S001546236	uncultured Gemella sp.; VE30A10; GQ179693	2698	0
a58h02	S001546236	uncultured Gemella sp.; VE30A10; GQ179693	2565	0
a58h03	S001546273	uncultured Sneathia sp.; VE12E10; GQ179730	2452	0
a58h04	S001088824	uncultured Sneathia sp.; 301; EU644481	2464	0
a58h05	S000404352	Veillonella montpellierensis; 2001-112662; AY244769	2533	0
a58h06	S001744223	Mycoplasma hominis; PG21; FP236530	2573	0
a58h07	S001088824	uncultured Sneathia sp.; 301; EU644481	2539	0
a58h08	S001546273	uncultured Sneathia sp.; VE12E10; GQ179730	2593	0
a58h09	S001546274	uncultured Aerococcus sp.; VE4G11; GQ179731	2460	0
a58h10	S001546281	uncultured Prevotella sp.; VE12H08; GQ179738	1963	0
a58h12	S001546281	uncultured Prevotella sp.; VE12H08; GQ179738	2385	0
a59a01	S001546281	uncultured Prevotella sp.; VE12H08; GQ179738	2371	0
a59a04	S000404352	Veillonella montpellierensis; 2001-112662; AY244769	2656	0
a59a07	S001546281	uncultured Prevotella sp.; VE12H08; GQ179738	2349	0
a59a08	S001088824	uncultured Sneathia sp.; 301; EU644481	2555	0
a59a09	S001546281	uncultured Prevotella sp.; VE12H08; GQ179738	2418	0
a59b01	S000404352	Veillonella montpellierensis; 2001-112662; AY244769	2690	0
a59b02	S000128467	Corynebacterium tuberculostearicum (T); CIP107291;	2704	0
a59b03	S000404352	Veillonella montpellierensis; 2001-112662; AY244769	2783	0
a59b04	S001546274	uncultured Aerococcus sp.; VE4G11; GQ179731	2710	0
a59b05	S001088824	uncultured Sneathia sp.; 301; EU644481	2688	0
a59b06	S001546274	uncultured Aerococcus sp.; VE4G11; GQ179731	2694	0
a59b08	S000404352	Veillonella montpellierensis; 2001-112662; AY244769	2775	0
a59b09	S001546236	uncultured Gemella sp.; VE30A10; GQ179693	2615	0
a59b10	S001546236	uncultured Gemella sp.; VE30A10; GQ179693	2629	0
a59b11	S001546281	uncultured Prevotella sp.; VE12H08; GQ179738	2422	0
a59b12	S001265367	Yersinia kristensenii; Asd MY-1; FM955884	2559	0
a59c01	S000404352	Veillonella montpellierensis; 2001-112662; AY244769	2759	0
a59c03	S000404352	Veillonella montpellierensis; 2001-112662; AY244769	2767	0
a59c04	S001546281	uncultured Prevotella sp.; VE12H08; GQ179738	2617	0
a59c05	S001546274	uncultured Aerococcus sp.; VE4G11; GQ179731	2678	0
a59c06	S000404352	Veillonella montpellierensis; 2001-112662; AY244769	2706	0
a59c07	S001546281	uncultured Prevotella sp.; VE12H08; GQ179738	2460	0
a59c08	S001546274	uncultured Aerococcus sp.; VE4G11; GQ179731	2710	0
a59c11	S001088824	uncultured Sneathia sp.; 301; EU644481	2631	0
a59c12	S001546281	uncultured Prevotella sp.; VE12H08; GQ179738	2633	0
a59d01	S001546274	uncultured Aerococcus sp.; VE4G11; GQ179731	2656	0
a59d02	S000658841	uncultured Gram-positive bacterium; rRNA-FR1; DQ316100	2640	0
a59d03	S001546236	uncultured Gemella sp.; VE30A10; GQ179693	2670	0
a59d05	S001088824	uncultured Sneathia sp.; 301; EU644481	2676	0
a59d06	S001546281	uncultured Prevotella sp.; VE12H08; GQ179738	2664	0
a59d07	S001546281	uncultured Prevotella sp.; VE12H08; GQ179738	2642	0
a59d08	S000404352	Veillonella montpellierensis; 2001-112662; AY244769	2476	0
a59d10	S001546274	uncultured Aerococcus sp.; VE4G11; GQ179731	2672	0
a59d12	S001546236	uncultured Gemella sp.; VE30A10; GQ179693	2409	0
a59e01	S001088824	uncultured Sneathia sp.; 301; EU644481	2629	0
a59e02	S000404352	Veillonella montpellierensis; 2001-112662; AY244769	2769	0
a59e03	S001088824	uncultured Sneathia sp.; 301; EU644481	2646	0
a59e04	S000658841	uncultured Gram-positive bacterium; rRNA-FR1; DQ316100	2656	0
a59e05	S000658841	uncultured Gram-positive bacterium; rRNA-FR1; DQ316100	2656	0
a59e06	S001546236	uncultured Gemella sp.; VE30A10; GQ179693	2617	0
a59e08	S001546236	uncultured Gemella sp.; VE30A10; GQ179693	2692	0
a59e10	S001910616	Lactobacillus iners (T); type strain: CCUG 28746; Y16329	2714	0
a59f01	S001088824	uncultured Sneathia sp.; 301; EU644481	2676	0
a59f02	S001546236	uncultured Gemella sp.; VE30A10; GQ179693	2700	0
a59f03	S001546281	uncultured Prevotella sp.; VE12H08; GQ179738	2591	0
a59f04	S001546281	uncultured Prevotella sp.; VE12H08; GQ179738	2650	0
a59f06	S001546281	uncultured Prevotella sp.; VE12H08; GQ179738	2656	0
a59f08	S000404352	Veillonella montpellierensis; 2001-112662; AY244769	2761	0
a59f09	S001546232	uncultured Dialister sp.; VE58E12; GQ179689	2682	0
a59f10	S001546236	uncultured Gemella sp.; VE30A10; GQ179693	2686	0
a59f11	S001088824	uncultured Sneathia sp.; 301; EU644481	2652	0
a59f12	S000404352	Veillonella montpellierensis; 2001-112662; AY244769	2569	0
a59g01	S000765352	uncultured Lachnospiraceae bacterium; MZH0805-50; EF120366	2652	0
a59g02	S001546274	uncultured Aerococcus sp.; VE4G11; GQ179731	2702	0
a59g03	S001546281	uncultured Prevotella sp.; VE12H08; GQ179738	2563	0
a59g04	S001187422	Ureaplasma urealyticum serovar 10 str. ATCC 33699;	2605	0
a59g05	S001546274	uncultured Aerococcus sp.; VE4G11; GQ179731	2539	0
a59g06	S001546274	uncultured Aerococcus sp.; VE4G11; GQ179731	2613	0
a59g07	S001546281	uncultured Prevotella sp.; VE12H08; GQ179738	2537	0
a59g08	S001546236	uncultured Gemella sp.; VE30A10; GQ179693	2639	0
a59g10	S001546236	uncultured Gemella sp.; VE30A10; GQ179693	2708	0
a59g11	S000404352	Veillonella montpellierensis; 2001-112662; AY244769	2690	0
a59g12	S001546236	uncultured Gemella sp.; VE30A10; GQ179693	2613	0
a59h01	S001088824	uncultured Sneathia sp.; 301; EU644481	2650	0
a59h02	S001546274	uncultured Aerococcus sp.; VE4G11; GQ179731	2676	0
a59h03	S001088824	uncultured Sneathia sp.; 301; EU644481	2597	0
a59h04	S000404352	Veillonella montpellierensis; 2001-112662; AY244769	2718	0
a59h05	S001546281	uncultured Prevotella sp.; VE12H08; GQ179738	2553	0
a59h06	S001546236	uncultured Gemella sp.; VE30A10; GQ179693	2678	0
a59h07	S001088824	uncultured Sneathia sp.; 301; EU644481	2625	0
a59h08	S001546274	uncultured Aerococcus sp.; VE4G11; GQ179731	2678	0
a59h09	S001744223	Mycoplasma hominis; PG21; FP236530	2664	0
a59h10	S000925605	Delftia sp. P-145; AM412120	2581	0
a60a02	S001265367	Yersinia kristensenii; Asd MY-1; FM955884	2153	0
a60a04	S001546273	uncultured Sneathia sp.; VE12E10; GQ179730	2357	0
a60a08	S001744223	Mycoplasma hominis; PG21; FP236530	2676	0
a60b01	S000013318	Aerococcus christensenii; CCUG 28826; Y17318	1626	0
a60b05	S001546236	uncultured Gemella sp.; VE30A10; GQ179693	2347	0
a60b07	S001088824	uncultured Sneathia sp.; 301; EU644481	2668	0
a60b11	S001088824	uncultured Sneathia sp.; 301; EU644481	1639	0
a60b12	S001088824	uncultured Sneathia sp.; 301; EU644481	2637	0
a60c02	S001546236	uncultured Gemella sp.; VE30A10; GQ179693	2716	0
a60c04	S000404352	Veillonella montpellierensis; 2001-112662; AY244769	2736	0
a60c07	S001088824	uncultured Sneathia sp.; 301; EU644481	2637	0
a60c08	S001088824	uncultured Sneathia sp.; 301; EU644481	2660	0
a60c09	S001088824	uncultured Sneathia sp.; 301; EU644481	2551	0
a60c10	S001088822	uncultured Sneathia sp.; 230; EU644479	2644	0
a60c11	S001088824	uncultured Sneathia sp.; 301; EU644481	2621	0
a60d01	S000404352	Veillonella montpellierensis; 2001-112662; AY244769	2413	0
a60d02	S001546281	uncultured Prevotella sp.; VE12H08; GQ179738	2640	0
a60d05	S001088824	uncultured Sneathia sp.; 301; EU644481	2627	0
a60d06	S000404352	Veillonella montpellierensis; 2001-112662; AY244769	2728	0
a60d07	S001088824	uncultured Sneathia sp.; 301; EU644481	2488	0
a60d08	S001088824	uncultured Sneathia sp.; 301; EU644481	2684	0
a60d09	S000404352	Veillonella montpellierensis; 2001-112662; AY244769	2670	0
a60d10	S001546274	uncultured Aerococcus sp.; VE4G11; GQ179731	2710	0
a60d11	S001546281	uncultured Prevotella sp.; VE12H08; GQ179738	2617	0
a60d12	S000412018	Lactobacillus iners; VA15_2004; AY526083	2646	0
a60e01	S000404352	Veillonella montpellierensis; 2001-112662; AY244769	2553	0
a60e02	S000404352	Veillonella montpellierensis; 2001-112662; AY244769	2696	0
a60e04	S001546281	uncultured Prevotella sp.; VE12H08; GQ179738	2625	0
a60e06	S001546281	uncultured Prevotella sp.; VE12H08; GQ179738	2648	0
a60e07	S001546281	uncultured Prevotella sp.; VE12H08; GQ179738	2664	0
a60e08	S001546274	uncultured Aerococcus sp.; VE4G11; GQ179731	2710	0
a60e10	S001546281	uncultured Prevotella sp.; VE12H08; GQ179738	2640	0
a60e11	S000765352	uncultured Lachnospiraceae bacterium; MZH0805-50; EF120366	2587	0
a60e12	S001546236	uncultured Gemella sp.; VE30A10; GQ179693	2472	0
a60f01	S001088824	uncultured Sneathia sp.; 301; EU644481	2629	0
a60f02	S001088822	uncultured Sneathia sp.; 230; EU644479	2615	0
a60f03	S000404352	Veillonella montpellierensis; 2001-112662; AY244769	2672	0
a60f04	S001546236	uncultured Gemella sp.; VE30A10; GQ179693	2684	0
a60f06	S000404352	Veillonella montpellierensis; 2001-112662; AY244769	2686	0
a60f07	S001546236	uncultured Gemella sp.; VE30A10; GQ179693	1699	0
a60f08	S001088824	uncultured Sneathia sp.; 301; EU644481	2646	0
a60f10	S000404352	Veillonella montpellierensis; 2001-112662; AY244769	2210	0
a60f12	S001546281	uncultured Prevotella sp.; VE12H08; GQ179738	2593	0
a60g01	S001546236	uncultured Gemella sp.; VE30A10; GQ179693	2621	0
a60g02	S001546274	uncultured Aerococcus sp.; VE4G11; GQ179731	2256	0
a60g03	S000404352	Veillonella montpellierensis; 2001-112662; AY244769	2434	0
a60g04	S001546274	uncultured Aerococcus sp.; VE4G11; GQ179731	2545	0
a60g06	S000404352	Veillonella montpellierensis; 2001-112662; AY244769	2688	0
a60g10	S001546281	uncultured Prevotella sp.; VE12H08; GQ179738	2603	0
a60g11	S001546273	uncultured Sneathia sp.; VE12E10; GQ179730	2591	0
a60g12	S001546236	uncultured Gemella sp.; VE30A10; GQ179693	2660	0
a60h01	S001546281	uncultured Prevotella sp.; VE12H08; GQ179738	2543	0
a60h02	S001088824	uncultured Sneathia sp.; 301; EU644481	2642	0
a60h04	S001546236	uncultured Gemella sp.; VE30A10; GQ179693	2674	0
a60h08	S001088824	uncultured Sneathia sp.; 301; EU644481	2658	0
a60h09	S001546281	uncultured Prevotella sp.; VE12H08; GQ179738	2535	0
a60h10	S001088824	uncultured Sneathia sp.; 301; EU644481	2676	0
a53a01	S001910616	Lactobacillus iners (T); type strain: CCUG 28746; Y16329	2728	0
a53a03	S000128467	Corynebacterium tuberculostearicum (T); CIP107291;	2619	0
a53a04	S000404352	Veillonella montpellierensis; 2001-112662; AY244769	2361	0
a53a08	S001910616	Lactobacillus iners (T); type strain: CCUG 28746; Y16329	2595	0
a53a09	S001546273	uncultured Sneathia sp.; VE12E10; GQ179730	2365	0
a53b06	S001744707	Streptococcus mitis; KCOM 1379; GU045389	2631	0
a53b10	S000128467	Corynebacterium tuberculostearicum (T); CIP107291;	2524	0
a53c03	S001546273	uncultured Sneathia sp.; VE12E10; GQ179730	2506	0
a53c05	S001546273	uncultured Sneathia sp.; VE12E10; GQ179730	2589	0
a53c06	S000412018	Lactobacillus iners; VA15_2004; AY526083	2714	0
a53c08	S000412018	Lactobacillus iners; VA15_2004; AY526083	2730	0
a53c10	S000404352	Veillonella montpellierensis; 2001-112662; AY244769	2571	0
a53c11	S001088824	uncultured Sneathia sp.; 301; EU644481	2591	0
a53d01	S000609987	uncultured Eggerthella sp.; 123-f2 68; AY738656	1721	0
a53d02	S001744707	Streptococcus mitis; KCOM 1379; GU045389	2504	0
a53d06	S000412018	Lactobacillus iners; VA15_2004; AY526083	2319	0
a53d08	S001744707	Streptococcus mitis; KCOM 1379; GU045389	2635	0
a53d09	S000404352	Veillonella montpellierensis; 2001-112662; AY244769	2573	0
a53d10	S001910616	Lactobacillus iners (T); type strain: CCUG 28746; Y16329	2573	0
a53d11	S000412018	Lactobacillus iners; VA15_2004; AY526083	2526	0
a53e01	S000002016	Anaerococcus octavius (T); NCTC 9810; Y07841	2518	0
a53e02	S001088824	uncultured Sneathia sp.; 301; EU644481	2605	0
a53e05	S001546230	uncultured Veillonella sp.; VE28C02; GQ179687	2290	0
a53e07	S000404352	Veillonella montpellierensis; 2001-112662; AY244769	2456	0
a53e08	S000412018	Lactobacillus iners; VA15_2004; AY526083	2722	0
a53e10	S001910616	Lactobacillus iners (T); type strain: CCUG 28746; Y16329	2698	0
a53e11	S001546281	uncultured Prevotella sp.; VE12H08; GQ179738	2363	0
a53e12	S000404352	Veillonella montpellierensis; 2001-112662; AY244769	2686	0
a53f02	S000128467	Corynebacterium tuberculostearicum (T); CIP107291;	2522	0
a53f03	S001187422	Ureaplasma urealyticum serovar 10 str. ATCC 33699;	2625	0
a53f04	S000128467	Corynebacterium tuberculostearicum (T); CIP107291;	2597	0
a53f05	S000412018	Lactobacillus iners; VA15_2004; AY526083	2097	0
a53f06	S000432299	Anaerococcus lactolyticus (T); CCUG 31351; AF542233	2405	0
a53f08	S000887708	uncultured Firmicutes bacterium; F11_1H_FL; EF682866	1501	0
a53f09	S001088824	uncultured Sneathia sp.; 301; EU644481	2450	0
a53f10	S000404352	Veillonella montpellierensis; 2001-112662; AY244769	2611	0
a53g02	S001910616	Lactobacillus iners (T); type strain: CCUG 28746; Y16329	2680	0
a53g03	S000412018	Lactobacillus iners; VA15_2004; AY526083	2452	0
a53g04	S000658841	uncultured Gram-positive bacterium; rRNA-FR1; DQ316100	2401	0
a53g06	S001910616	Lactobacillus iners (T); type strain: CCUG 28746; Y16329	2639	0
a53g11	S001088824	uncultured Sneathia sp.; 301; EU644481	2490	0
a53g12	S000404352	Veillonella montpellierensis; 2001-112662; AY244769	2619	0
a53h01	S000404352	Veillonella montpellierensis; 2001-112662; AY244769	2577	0
a53h02	S000337826	uncultured Corynebacterium sp. MTcory16R; AF115941	2516	0
a53h04	S000412018	Lactobacillus iners; VA15_2004; AY526083	2609	0
a69b01	S000944569	uncultured Streptococcus sp.; 401H08(oral); AM420131	2274	0
a69b02	S001549312	Pseudomonas poae; LS172; FJ937922	2637	0
a69b05	S000944569	uncultured Streptococcus sp.; 401H08(oral); AM420131	2686	0
a69b06	S000944569	uncultured Streptococcus sp.; 401H08(oral); AM420131	2670	0
a69c01	S000944569	uncultured Streptococcus sp.; 401H08(oral); AM420131	2393	0
a69c06	S001549399	Aeromonas veronii; CYJ205; FJ940849	2343	0
a69d02	S000125884	Propionibacterium acnes; #5255; AB108482	2660	0
a69d06	S000944569	uncultured Streptococcus sp.; 401H08(oral); AM420131	2633	0
a69e02	S000944569	uncultured Streptococcus sp.; 401H08(oral); AM420131	2484	0
a69e04	S001294127	endosymbiont of Sphenophorus levis; L_E04full; FJ626265	2357	0
a69e06	S000944569	uncultured Streptococcus sp.; 401H08(oral); AM420131	2670	0
a69e11	S000944569	uncultured Streptococcus sp.; 401H08(oral); AM420131	2631	0
a69f01	S000944569	uncultured Streptococcus sp.; 401H08(oral); AM420131	2593	0
a69f06	S000944569	uncultured Streptococcus sp.; 401H08(oral); AM420131	2702	0
a69f07	S001294127	endosymbiont of Sphenophorus levis; L_E04full; FJ626265	2498	0
a69f09	S000366404	Corynebacterium pseudogenitalium; CIP106714, (ATCC33035),	2416	0
a69g01	S000944569	uncultured Streptococcus sp.; 401H08(oral); AM420131	2472	0
a69g02	S001792989	Propionibacterium acnes; JCM 6425; AB538431	2644	0
a69g06	S000944569	uncultured Streptococcus sp.; 401H08(oral); AM420131	2121	0
a69g09	S000944569	uncultured Streptococcus sp.; 401H08(oral); AM420131	2323	0
a69g10	S001796257	Corynebacterium sp. NML99-0020; GU304643	2587	0
a69h02	S001792989	Propionibacterium acnes; JCM 6425; AB538431	2603	0
a69h05	S000130866	Corynebacterium tuberculostearicum; CIP107067; AJ438051	2163	0
a69h07	S000944569	uncultured Streptococcus sp.; 401H08(oral); AM420131	2589	0
a69h12	S000574764	Streptococcus thermophilus; CIP 67.56; NCDO 2563; AY687383	2611	0
a70a04	S000944569	uncultured Streptococcus sp.; 401H08(oral); AM420131	2438	0
a70a05	S001294127	endosymbiont of Sphenophorus levis; L_E04full; FJ626265	2192	0
a70b01	S000944569	uncultured Streptococcus sp.; 401H08(oral); AM420131	2426	0
a70b03	S000944569	uncultured Streptococcus sp.; 401H08(oral); AM420131	2573	0
a70b06	S001044265	Escherichia coli str. K12 substr. DH10B; K-12; CP000948	2640	0
a70b08	S000125884	Propionibacterium acnes; #5255; AB108482	2397	0
a70b11	S000944569	uncultured Streptococcus sp.; 401H08(oral); AM420131	2458	0
a70c09	S001294127	endosymbiont of Sphenophorus levis; L_E04full; FJ626265	2333	0
a70c10	S000944569	uncultured Streptococcus sp.; 401H08(oral); AM420131	2646	0
a70d01	S000128467	Corynebacterium tuberculostearicum (T); CIP107291;	2375	0
a70d04	S001352168	Streptococcus pneumoniae; ToTT; FJ823147	2514	0
a70d06	S001152295	Stenotrophomonas maltophilia R551-3; CP001111	2672	0
a70d10	S000944569	uncultured Streptococcus sp.; 401H08(oral); AM420131	2662	0
a70e02	S000944569	uncultured Streptococcus sp.; 401H08(oral); AM420131	2581	0
a70e12	S000574764	Streptococcus thermophilus; CIP 67.56; NCDO 2563; AY687383	2652	0
a70f02	S000944569	uncultured Streptococcus sp.; 401H08(oral); AM420131	2631	0
a70g02	S000944569	uncultured Streptococcus sp.; 401H08(oral); AM420131	2658	0
a70g05	S000944569	uncultured Streptococcus sp.; 401H08(oral); AM420131	2545	0
a70g06	S000944569	uncultured Streptococcus sp.; 401H08(oral); AM420131	2658	0
a70g07	S000944569	uncultured Streptococcus sp.; 401H08(oral); AM420131	2436	0
a70g10	S000944569	uncultured Streptococcus sp.; 401H08(oral); AM420131	2529	0
a70h01	S000944569	uncultured Streptococcus sp.; 401H08(oral); AM420131	2609	0
a70h07	S000944569	uncultured Streptococcus sp.; 401H08(oral); AM420131	2198	0
a70h11	S000965282	Delftia acidovorans SPH-1; CP000884	2482	0
a71a01	S000944569	uncultured Streptococcus sp.; 401H08(oral); AM420131	2559	0
a71a04	S000944569	uncultured Streptococcus sp.; 401H08(oral); AM420131	2627	0
a71a06	S000944569	uncultured Streptococcus sp.; 401H08(oral); AM420131	2533	0
a71a07	S000944569	uncultured Streptococcus sp.; 401H08(oral); AM420131	2313	0
a71b01	S000944569	uncultured Streptococcus sp.; 401H08(oral); AM420131	2617	0
a71b02	S000944569	uncultured Streptococcus sp.; 401H08(oral); AM420131	2639	0
a71b06	S001294127	endosymbiont of Sphenophorus levis; L_E04full; FJ626265	2535	0
a71b12	S000944569	uncultured Streptococcus sp.; 401H08(oral); AM420131	2278	0
a71c02	S001549312	Pseudomonas poae; LS172; FJ937922	2637	0
a71d03	S000944493	uncultured Streptococcus sp.; 202H12(oral); AM420055	2321	0
a71d04	S000944569	uncultured Streptococcus sp.; 401H08(oral); AM420131	2662	0
a71d11	S001172343	uncultured Streptococcus sp.; 2.17; DQ346435	2472	0
a71e01	S000944569	uncultured Streptococcus sp.; 401H08(oral); AM420131	2613	0
a71e02	S000944569	uncultured Streptococcus sp.; 401H08(oral); AM420131	2670	0
a71e03	S000944569	uncultured Streptococcus sp.; 401H08(oral); AM420131	2613	0
a71e04	S001544369	uncultured Staphylococcus sp.; GI8-sp-B04; GQ129860	2522	0
a71e05	S000944569	uncultured Streptococcus sp.; 401H08(oral); AM420131	2321	0
a71e06	S000944569	uncultured Streptococcus sp.; 401H08(oral); AM420131	2656	0
a71e10	S000944569	uncultured Streptococcus sp.; 401H08(oral); AM420131	2640	0
a71e11	S000944569	uncultured Streptococcus sp.; 401H08(oral); AM420131	2210	0
a71f01	S000944569	uncultured Streptococcus sp.; 401H08(oral); AM420131	2535	0
a71f02	S000944569	uncultured Streptococcus sp.; 401H08(oral); AM420131	2670	0
a71f04	S000944569	uncultured Streptococcus sp.; 401H08(oral); AM420131	2512	0
a71f05	S001352168	Streptococcus pneumoniae; ToTT; FJ823147	2526	0
a71f09	S000944569	uncultured Streptococcus sp.; 401H08(oral); AM420131	2270	0
a71f11	S000944569	uncultured Streptococcus sp.; 401H08(oral); AM420131	2575	0
a71g02	S000944569	uncultured Streptococcus sp.; 401H08(oral); AM420131	2635	0
a71g05	S000944569	uncultured Streptococcus sp.; 401H08(oral); AM420131	2664	0
a71g08	S000415358	Staphylococcus sp. H292; AB177642	2559	0
a71g09	S000944569	uncultured Streptococcus sp.; 401H08(oral); AM420131	2292	0
a71g10	S000944569	uncultured Streptococcus sp.; 401H08(oral); AM420131	2613	0
a71g12	S000965282	Delftia acidovorans SPH-1; CP000884	2692	0
a71h01	S000944569	uncultured Streptococcus sp.; 401H08(oral); AM420131	2621	0
a71h02	S000944569	uncultured Streptococcus sp.; 401H08(oral); AM420131	2648	0
a71h03	S001044265	Escherichia coli str. K12 substr. DH10B; K-12; CP000948	2696	0
a71h04	S000965282	Delftia acidovorans SPH-1; CP000884	2422	0
a71h05	S000944569	uncultured Streptococcus sp.; 401H08(oral); AM420131	2553	0
a71h09	S000944569	uncultured Streptococcus sp.; 401H08(oral); AM420131	2149	0
a71h10	S000944569	uncultured Streptococcus sp.; 401H08(oral); AM420131	2545	0
a71h11	S000002016	Anaerococcus octavius (T); NCTC 9810; Y07841	2345	0
a71h12	S000944569	uncultured Streptococcus sp.; 401H08(oral); AM420131	2561	0
a72a04	S001544585	uncultured Streptococcus sp.; GI-10-G15; GQ130076	2230	0
a72a11	S000944569	uncultured Streptococcus sp.; 401H08(oral); AM420131	2341	0
a72b01	S000944569	uncultured Streptococcus sp.; 401H08(oral); AM420131	2535	0
a72b02	S001792989	Propionibacterium acnes; JCM 6425; AB538431	2514	0
a72b04	S000944569	uncultured Streptococcus sp.; 401H08(oral); AM420131	2631	0
a72b05	S000944569	uncultured Streptococcus sp.; 401H08(oral); AM420131	2670	0
a72b07	S000944569	uncultured Streptococcus sp.; 401H08(oral); AM420131	2559	0
a72b08	S000944569	uncultured Streptococcus sp.; 401H08(oral); AM420131	2504	0
a72c01	S000944569	uncultured Streptococcus sp.; 401H08(oral); AM420131	2646	0
a72c05	S000944569	uncultured Streptococcus sp.; 401H08(oral); AM420131	2514	0
a72c06	S000944569	uncultured Streptococcus sp.; 401H08(oral); AM420131	2599	0
a72c08	S000944569	uncultured Streptococcus sp.; 401H08(oral); AM420131	2214	0
a72c12	S000944569	uncultured Streptococcus sp.; 401H08(oral); AM420131	1580	0
a72d10	S000607914	Staphylococcus sp. R-25050; AM084016	2644	0
a72e05	S000944569	uncultured Streptococcus sp.; 401H08(oral); AM420131	2565	0
a72e10	S000944569	uncultured Streptococcus sp.; 401H08(oral); AM420131	2670	0
a72f02	S001417391	Acinetobacter baumannii; RUH 0875; FJ867355	2520	0
a72f09	S001796257	Corynebacterium sp. NML99-0020; GU304643	2232	0
a72g05	S000944569	uncultured Streptococcus sp.; 401H08(oral); AM420131	2395	0
a72h01	S000944569	uncultured Streptococcus sp.; 401H08(oral); AM420131	2597	0
a72h02	S000944569	uncultured Streptococcus sp.; 401H08(oral); AM420131	2611	0
a72h04	S000415358	Staphylococcus sp. H292; AB177642	2642	0
a72h07	S001610969	Escherichia coli DH1; CP001637	2581	0
a72h08	S000944569	uncultured Streptococcus sp.; 401H08(oral); AM420131	2577	0
a72h11	S000944569	uncultured Streptococcus sp.; 401H08(oral); AM420131	2640	0
a17h10	S001910616	Lactobacillus iners (T); type strain: CCUG 28746; Y16329	2769	0
a17h11	S001910616	Lactobacillus iners (T); type strain: CCUG 28746; Y16329	2769	0
a17a03	S001910616	Lactobacillus iners (T); type strain: CCUG 28746; Y16329	2662	0
a17a05	S001910616	Lactobacillus iners (T); type strain: CCUG 28746; Y16329	2732	0
a17a06	S001910616	Lactobacillus iners (T); type strain: CCUG 28746; Y16329	2742	0
a17a07	S001796262	Corynebacterium sp. NML94-0264; GU304653	2629	0
a17a09	S001910616	Lactobacillus iners (T); type strain: CCUG 28746; Y16329	2740	0
a17a11	S001910616	Lactobacillus iners (T); type strain: CCUG 28746; Y16329	2755	0
a17a12	S001910616	Lactobacillus iners (T); type strain: CCUG 28746; Y16329	2646	0
a17b01	S001910616	Lactobacillus iners (T); type strain: CCUG 28746; Y16329	2753	0
a17b02	S001796262	Corynebacterium sp. NML94-0264; GU304653	2591	0
a17b03	S001796262	Corynebacterium sp. NML94-0264; GU304653	2654	0
a17b05	S001910616	Lactobacillus iners (T); type strain: CCUG 28746; Y16329	2660	0
a17b06	S001796262	Corynebacterium sp. NML94-0264; GU304653	2639	0
a17b07	S001796262	Corynebacterium sp. NML94-0264; GU304653	2633	0
a17b08	S001796262	Corynebacterium sp. NML94-0264; GU304653	2242	0
a17b09	S001910616	Lactobacillus iners (T); type strain: CCUG 28746; Y16329	2769	0
a17b11	S001910616	Lactobacillus iners (T); type strain: CCUG 28746; Y16329	2748	0
a17c01	S001910616	Lactobacillus iners (T); type strain: CCUG 28746; Y16329	2740	0
a17c02	S001910616	Lactobacillus iners (T); type strain: CCUG 28746; Y16329	2732	0
a17c03	S001910616	Lactobacillus iners (T); type strain: CCUG 28746; Y16329	2637	0
a17c05	S001910616	Lactobacillus iners (T); type strain: CCUG 28746; Y16329	2763	0
a17c06	S001796262	Corynebacterium sp. NML94-0264; GU304653	2640	0
a17c07	S001910616	Lactobacillus iners (T); type strain: CCUG 28746; Y16329	2755	0
a17c08	S001910616	Lactobacillus iners (T); type strain: CCUG 28746; Y16329	2714	0
a17c09	S001910616	Lactobacillus iners (T); type strain: CCUG 28746; Y16329	2757	0
a17c10	S001796262	Corynebacterium sp. NML94-0264; GU304653	2640	0
a17c12	S001910616	Lactobacillus iners (T); type strain: CCUG 28746; Y16329	2724	0
a17d01	S001796262	Corynebacterium sp. NML94-0264; GU304653	2387	0
a53h05	S000412018	Lactobacillus iners; VA15_2004; AY526083	2494	0
a53h06	S001744707	Streptococcus mitis; KCOM 1379; GU045389	2569	0
a53h07	S000130232	Corynebacterium tuberculostearicum; CIP102346; AJ438045	2589	0
a53h08	S000366404	Corynebacterium pseudogenitalium; CIP106714, (ATCC33035),	2474	0
a53h09	S000366404	Corynebacterium pseudogenitalium; CIP106714, (ATCC33035),	2581	0
a53h10	S001910616	Lactobacillus iners (T); type strain: CCUG 28746; Y16329	2635	0
a53h11	S001088824	uncultured Sneathia sp.; 301; EU644481	2416	0
a54a04	S000412018	Lactobacillus iners; VA15_2004; AY526083	2343	0
a54b06	S000404352	Veillonella montpellierensis; 2001-112662; AY244769	2579	0
a54c01	S000366404	Corynebacterium pseudogenitalium; CIP106714, (ATCC33035),	2619	0
a54c05	S001546273	uncultured Sneathia sp.; VE12E10; GQ179730	2531	0
a54c11	S001088824	uncultured Sneathia sp.; 301; EU644481	2520	0
a54d04	S001546274	uncultured Aerococcus sp.; VE4G11; GQ179731	2591	0
a54d06	S000357056	uncultured Streptococcus sp.; AY256519	2436	0
a54d07	S001546273	uncultured Sneathia sp.; VE12E10; GQ179730	2543	0
a54d10	S001744707	Streptococcus mitis; KCOM 1379; GU045389	2456	0
a54d11	S000404352	Veillonella montpellierensis; 2001-112662; AY244769	2474	0
a54e01	S000404352	Veillonella montpellierensis; 2001-112662; AY244769	2543	0
a54e02	S000412018	Lactobacillus iners; VA15_2004; AY526083	2621	0
a54e06	S001910616	Lactobacillus iners (T); type strain: CCUG 28746; Y16329	2769	0
a54e07	S000721364	Corynebacterium aurimucosum; AE1-3; AB269764	2393	0
a54e08	S001546230	uncultured Veillonella sp.; VE28C02; GQ179687	2585	0
a54e11	S000412018	Lactobacillus iners; VA15_2004; AY526083	2341	0
a54e12	S001546281	uncultured Prevotella sp.; VE12H08; GQ179738	2422	0
a54f02	S001546273	uncultured Sneathia sp.; VE12E10; GQ179730	2512	0
a54f04	S000404352	Veillonella montpellierensis; 2001-112662; AY244769	2262	0
a54f06	S000404352	Veillonella montpellierensis; 2001-112662; AY244769	2587	0
a54f08	S000750307	Prevotella timonensis (T); 4401737; DQ518919	2228	0
a54f11	S001546273	uncultured Sneathia sp.; VE12E10; GQ179730	2325	0
a54f12	S000366404	Corynebacterium pseudogenitalium; CIP106714, (ATCC33035),	2458	0
a54g02	S000366404	Corynebacterium pseudogenitalium; CIP106714, (ATCC33035),	2526	0
a54g03	S000337826	uncultured Corynebacterium sp. MTcory16R; AF115941	2260	0
a54g04	S001546281	uncultured Prevotella sp.; VE12H08; GQ179738	2345	0
a54g08	S000412018	Lactobacillus iners; VA15_2004; AY526083	2339	0
a54g10	S000412018	Lactobacillus iners; VA15_2004; AY526083	2646	0
a54g11	S000128467	Corynebacterium tuberculostearicum (T); CIP107291;	2488	0
a54h01	S000404352	Veillonella montpellierensis; 2001-112662; AY244769	2690	0
a54h02	S001088824	uncultured Sneathia sp.; 301; EU644481	2575	0
a54h03	S000404352	Veillonella montpellierensis; 2001-112662; AY244769	2518	0
a54h04	S001546230	uncultured Veillonella sp.; VE28C02; GQ179687	2159	0
a54h06	S000412018	Lactobacillus iners; VA15_2004; AY526083	2547	0
a54h07	S000366404	Corynebacterium pseudogenitalium; CIP106714, (ATCC33035),	2415	0
a54h10	S001546281	uncultured Prevotella sp.; VE12H08; GQ179738	2474	0
a54h11	S001744707	Streptococcus mitis; KCOM 1379; GU045389	2664	0
a55a03	S001088824	uncultured Sneathia sp.; 301; EU644481	2539	0
a55a04	S001546274	uncultured Aerococcus sp.; VE4G11; GQ179731	2309	0
a55a12	S001546281	uncultured Prevotella sp.; VE12H08; GQ179738	2502	0
a55b02	S001910616	Lactobacillus iners (T); type strain: CCUG 28746; Y16329	2700	0
a55b03	S000130866	Corynebacterium tuberculostearicum; CIP107067; AJ438051	2486	0
a55b05	S000995082	Finegoldia magna ATCC 29328; AP008971	2341	0
a55b09	S001546281	uncultured Prevotella sp.; VE12H08; GQ179738	2093	0
a55b10	S000404352	Veillonella montpellierensis; 2001-112662; AY244769	2714	0
a55c02	S000412018	Lactobacillus iners; VA15_2004; AY526083	2648	0
a55c05	S000412018	Lactobacillus iners; VA15_2004; AY526083	2619	0
a55c06	S000404352	Veillonella montpellierensis; 2001-112662; AY244769	2688	0
a55c09	S001546273	uncultured Sneathia sp.; VE12E10; GQ179730	2385	0
a55d03	S001546273	uncultured Sneathia sp.; VE12E10; GQ179730	2543	0
a55d04	S000366404	Corynebacterium pseudogenitalium; CIP106714, (ATCC33035),	2418	0
a55d05	S001546273	uncultured Sneathia sp.; VE12E10; GQ179730	2450	0
a55d06	S001088824	uncultured Sneathia sp.; 301; EU644481	2654	0
a55d07	S001546281	uncultured Prevotella sp.; VE12H08; GQ179738	2557	0
a55d09	S000128467	Corynebacterium tuberculostearicum (T); CIP107291;	2494	0
a55d12	S000404352	Veillonella montpellierensis; 2001-112662; AY244769	2476	0
a55e02	S001907903	Clostridiales bacterium oral taxon C16; CMC1475;	844	0
a55e06	S000404352	Veillonella montpellierensis; 2001-112662; AY244769	2607	0
a55e07	S001088824	uncultured Sneathia sp.; 301; EU644481	2496	0
a55e08	S000404352	Veillonella montpellierensis; 2001-112662; AY244769	2571	0
a55e10	S001744707	Streptococcus mitis; KCOM 1379; GU045389	2545	0
a55f01	S001187424	Ureaplasma urealyticum serovar 10 str. ATCC 33699;	2595	0
a55f02	S000404352	Veillonella montpellierensis; 2001-112662; AY244769	2553	0
a55f03	S000366404	Corynebacterium pseudogenitalium; CIP106714, (ATCC33035),	2639	0
a55f04	S000366404	Corynebacterium pseudogenitalium; CIP106714,	1620	0
a55f06	S000404352	Veillonella montpellierensis; 2001-112662; AY244769	2591	0
a55f08	S001910616	Lactobacillus iners (T); type strain: CCUG 28746; Y16329	2732	0
a55f10	S001796255	Corynebacterium sp. NML93-0607; GU304633	2549	0
a55f11	S001546281	uncultured Prevotella sp.; VE12H08; GQ179738	2595	0
a55g04	S001546273	uncultured Sneathia sp.; VE12E10; GQ179730	2252	0
a55g05	S001546281	uncultured Prevotella sp.; VE12H08; GQ179738	2121	0
a55g07	S000366404	Corynebacterium pseudogenitalium; CIP106714, (ATCC33035),	2196	0
a55g08	S000412018	Lactobacillus iners; VA15_2004; AY526083	2621	0
a55g09	S000404352	Veillonella montpellierensis; 2001-112662; AY244769	2484	0
a55g10	S000366404	Corynebacterium pseudogenitalium; CIP106714, (ATCC33035),	2541	0
a55g12	S001546281	uncultured Prevotella sp.; VE12H08; GQ179738	2579	0
a55h01	S001910616	Lactobacillus iners (T); type strain: CCUG 28746; Y16329	2720	0
a55h03	S001910616	Lactobacillus iners (T); type strain: CCUG 28746; Y16329	2644	0
a55h04	S000404352	Veillonella montpellierensis; 2001-112662; AY244769	2642	0
a55h05	S000404352	Veillonella montpellierensis; 2001-112662; AY244769	2591	0
a55h06	S001088824	uncultured Sneathia sp.; 301; EU644481	2591	0
a55h07	S001744707	Streptococcus mitis; KCOM 1379; GU045389	2613	0
a55h08	S001088824	uncultured Sneathia sp.; 301; EU644481	2565	0
a55h09	S000601338	uncultured Clostridia bacterium; MT05A_E08; DQ169714	1491	0
a55h10	S000571641	Staphylococcus haemolyticus JCSC1435; AP006716	2639	0
a56b02	S000404352	Veillonella montpellierensis; 2001-112662; AY244769	2565	0
a56b07	S001546273	uncultured Sneathia sp.; VE12E10; GQ179730	2589	0
a56b09	S001910616	Lactobacillus iners (T); type strain: CCUG 28746; Y16329	2700	0
a56c01	S000412018	Lactobacillus iners; VA15_2004; AY526083	2637	0
a56c02	S001546281	uncultured Prevotella sp.; VE12H08; GQ179738	2428	0
a56c05	S000404352	Veillonella montpellierensis; 2001-112662; AY244769	2270	0
a56c06	S001546273	uncultured Sneathia sp.; VE12E10; GQ179730	2359	0
a56c07	S000404352	Veillonella montpellierensis; 2001-112662; AY244769	2385	0
a56c09	S001744707	Streptococcus mitis; KCOM 1379; GU045389	2482	0
a56c10	S000412018	Lactobacillus iners; VA15_2004; AY526083	2740	0
a56d07	S001744707	Streptococcus mitis; KCOM 1379; GU045389	2559	0
a56d08	S000366404	Corynebacterium pseudogenitalium; CIP106714, (ATCC33035),	2581	0
a56d10	S000404352	Veillonella montpellierensis; 2001-112662; AY244769	2329	0
a56d11	S000450504	Leptotrichia amnionii; AY489565	2559	0
a56d12	S000404352	Veillonella montpellierensis; 2001-112662; AY244769	2625	0
a56e02	S001546273	uncultured Sneathia sp.; VE12E10; GQ179730	2567	0
a56e09	S001796265	Corynebacterium sp. NML00-0179; GU304659	2121	0
a56e10	S000404352	Veillonella montpellierensis; 2001-112662; AY244769	2597	0
a56e12	S000260721	Corynebacterium ulcerans (T); NCTC 7910; X84256	1701	0
a56f05	S001546232	uncultured Dialister sp.; VE58E12; GQ179689	2535	0
a56f09	S000412018	Lactobacillus iners; VA15_2004; AY526083	2409	0
a56g02	S000412018	Lactobacillus iners; VA15_2004; AY526083	2593	0
a56g04	S000412018	Lactobacillus iners; VA15_2004; AY526083	2601	0
a56g05	S000128467	Corynebacterium tuberculostearicum (T); CIP107291;	2202	0
a56g08	S001546274	uncultured Aerococcus sp.; VE4G11; GQ179731	2611	0
a56g09	S000366404	Corynebacterium pseudogenitalium; CIP106714, (ATCC33035),	2502	0
a56g10	S001744707	Streptococcus mitis; KCOM 1379; GU045389	2688	0
a56g11	S000404352	Veillonella montpellierensis; 2001-112662; AY244769	2371	0
a56h01	S000366404	Corynebacterium pseudogenitalium; CIP106714, (ATCC33035),	2619	0
a56h02	S000000392	Granulicatella elegans; 4067-96; Y15413	2597	0
a56h03	S001546230	uncultured Veillonella sp.; VE28C02; GQ179687	2502	0
a56h04	S000366404	Corynebacterium pseudogenitalium; CIP106714, (ATCC33035),	2601	0
a56h06	S001088824	uncultured Sneathia sp.; 301; EU644481	2579	0
a56h07	S001744707	Streptococcus mitis; KCOM 1379; GU045389	2605	0
a56h08	S000420022	Streptococcus mitis; ATCC 49456; GCSS 1303; AY485601	2329	0
a56h09	S000658841	uncultured Gram-positive bacterium; rRNA-FR1; DQ316100	2478	0
a56h10	S001088824	uncultured Sneathia sp.; 301; EU644481	2591	0
a56h11	S001088824	uncultured Sneathia sp.; 301; EU644481	2573	0
a73a05	S001265367	Yersinia kristensenii; Asd MY-1; FM955884	2232	0
a73c03	S001169272	Corynebacterium pseudogenitalium; ES_MS38c; EU888521	2212	0
a73d03	S000130232	Corynebacterium tuberculostearicum; CIP102346; AJ438045	2185	0
a73e01	S000130232	Corynebacterium tuberculostearicum; CIP102346; AJ438045	2535	0
a73e04	S001549312	Pseudomonas poae; LS172; FJ937922	2601	0
a73f01	S000130232	Corynebacterium tuberculostearicum; CIP102346; AJ438045	2631	0
a73f02	S000925594	Sphingobacterium sp. P-7; AM411964	2032	0
a73f04	S001265367	Yersinia kristensenii; Asd MY-1; FM955884	2196	0
a73g08	S000130232	Corynebacterium tuberculostearicum; CIP102346; AJ438045	2571	0
a73g09	S000129598	uncultured proteobacterium; 228; AJ310680	2248	0
a73h02	S000571643	Staphylococcus haemolyticus JCSC1435; AP006716	2635	0
a73h06	S001265367	Yersinia kristensenii; Asd MY-1; FM955884	2646	0
a73h07	S000366404	Corynebacterium pseudogenitalium; CIP106714, (ATCC33035),	2466	0
a74b10	S000130232	Corynebacterium tuberculostearicum; CIP102346; AJ438045	2577	0
a74f01	S000130232	Corynebacterium tuberculostearicum; CIP102346; AJ438045	2480	0
a74f02	S000130232	Corynebacterium tuberculostearicum; CIP102346; AJ438045	2599	0
a74g03	S000389740	Corynebacterium sp. 61720; AF234634	2452	0
a74h01	S000701293	Pedobacter rhizospharae; type strain: 01-96; AM279214	2089	0
a74h02	S000965282	Delftia acidovorans SPH-1; CP000884	2621	0
a75a09	S001265367	Yersinia kristensenii; Asd MY-1; FM955884	2303	0
a75f01	S000130232	Corynebacterium tuberculostearicum; CIP102346; AJ438045	2482	0
a75f05	S001387356	uncultured Bacteroidetes bacterium; TR1C12; FJ916091	1453	0
a75g03	S000130232	Corynebacterium tuberculostearicum; CIP102346; AJ438045	2442	0
a75g09	S000965282	Delftia acidovorans SPH-1; CP000884	2660	0
a75h05	S001095013	Vibrio vulnificus; ATCC 27562; 01_B09; EF546247	1606	0
a75h08	S000130232	Corynebacterium tuberculostearicum; CIP102346; AJ438045	2444	0
a75h09	S000130232	Corynebacterium tuberculostearicum; CIP102346; AJ438045	2496	0
a76d06	S000014824	Flavobacterium sp. EP240; AF493643	2381	0
a76f01	S000130232	Corynebacterium tuberculostearicum; CIP102346; AJ438045	2593	0
a76f09	S001417947	Stenotrophomonas maltophilia; PSM-2; FJ906801	2430	0
a76g01	S000428511	Simplicispira psychrophila (T); LMG 5408; AF078755	2256	0
a76h02	S000130232	Corynebacterium tuberculostearicum; CIP102346; AJ438045	2551	0
a76h04	S000571641	Staphylococcus haemolyticus JCSC1435; AP006716	2637	0
a76h05	S000130232	Corynebacterium tuberculostearicum; CIP102346; AJ438045	2250	0
a76h07	S000366404	Corynebacterium pseudogenitalium; CIP106714, (ATCC33035),	2654	0
a26h10	S000392974	Sphingomonas sp. G296-14; AF395037	2531	0
a26h12	S001178835	uncultured Stenotrophomonas sp.; GI6-10b-C05; FJ193149	2718	0
a27c10	S001610969	Escherichia coli DH1; CP001637	2744	0
a28c05	S001336093	uncultured Pseudomonadales bacterium; 4-1_19; FJ517681	2666	0
a25a02	S000392974	Sphingomonas sp. G296-14; AF395037	2428	0
a25a04	S000926008	Serratia proteamaculans 568; CP000826	2571	0
a25a05	S000749977	Propionibacterium sp. 215(113zx); AM410900	2305	0
a25a07	S000965282	Delftia acidovorans SPH-1; CP000884	2426	0
a25a08	S000562039	uncultured alpha proteobacterium; APe2_70; AB074649	2424	0
a25a09	S000337826	uncultured Corynebacterium sp. MTcory16R; AF115941	2175	0
a25a10	S000392952	blackwater bioreactor bacterium BW6; AF394171	2468	0
a25b02	S000859963	Enterococcus gilvus; 2366; EF535229	2692	0
a25b04	S001549125	Pseudomonas sp. AceL-2; FJ605380	2529	0
a25b07	S001792989	Propionibacterium acnes; JCM 6425; AB538431	2652	0
a25b08	S001874546	Hymenobacter sp. NMC04; GU321347	2319	0
a25b10	S001792989	Propionibacterium acnes; JCM 6425; AB538431	2464	0
a25b11	S001793863	Aeromonas salmonicida subsp. salmonicida; CIP 57.50;	2726	0
a25c02	S000133722	Enterobacter asburiae; MY2; AJ506159	2666	0
a25c04	S001152258	Neisseria gonorrhoeae NCCP11945; CP001050	2650	0
a25c05	S001610969	Escherichia coli DH1; CP001637	2514	0
a25c08	S001792989	Propionibacterium acnes; JCM 6425; AB538431	2692	0
a25c09	S001075654	uncultured Shigella sp.; M7-22; EU530456	2742	0
a25c10	S000965282	Delftia acidovorans SPH-1; CP000884	2724	0
a25c11	S001016338	Ochrobactrum sp. PED4-7; EU529846	2109	0
a25d02	S001016338	Ochrobactrum sp. PED4-7; EU529846	2397	0
a25d03	S000337826	uncultured Corynebacterium sp. MTcory16R; AF115941	2571	0
a25d06	S001417225	Staphylococcus epidermidis; MB; FJ768459	2698	0
a25d07	S000128169	Stenotrophomonas maltophilia; e-a21; AJ293470	2302	0
a25d09	S001909596	Bacillus sp. oral taxon F28; VK010; GU431508	942	0
a25d10	S000926008	Serratia proteamaculans 568; CP000826	2712	0
a25d12	S001417225	Staphylococcus epidermidis; MB; FJ768459	2603	0
a25e01	S001792989	Propionibacterium acnes; JCM 6425; AB538431	2535	0
a25e02	S001792989	Propionibacterium acnes; JCM 6425; AB538431	2260	0
a25e04	S001792989	Propionibacterium acnes; JCM 6425; AB538431	2724	0
a25e06	S001792989	Propionibacterium acnes; JCM 6425; AB538431	2587	0
a25e07	S001341132	uncultured marine bacterium; A6-3-69; FJ826377	2573	0
a25e10	S000744818	uncultured beta proteobacterium; XME18; EF061949	2716	0
a25e11	S001016338	Ochrobactrum sp. PED4-7; EU529846	2224	0
a25e12	S001016338	Ochrobactrum sp. PED4-7; EU529846	2339	0
a25f03	S001152258	Neisseria gonorrhoeae NCCP11945; CP001050	2288	0
a25f04	S001572961	Escherichia coli BL21(DE3); CP001665	2448	0
a25f06	S001075654	uncultured Shigella sp.; M7-22; EU530456	2690	0
a25f07	S001792989	Propionibacterium acnes; JCM 6425; AB538431	2599	0
a25f09	S001016338	Ochrobactrum sp. PED4-7; EU529846	2317	0
a25f12	S001016338	Ochrobactrum sp. PED4-7; EU529846	2506	0
a25g02	S001792989	Propionibacterium acnes; JCM 6425; AB538431	2716	0
a25g04	S000965282	Delftia acidovorans SPH-1; CP000884	2650	0
a25g06	S001792989	Propionibacterium acnes; JCM 6425; AB538431	2535	0
a25g08	S000701293	Pedobacter rhizospharae; type strain: 01-96; AM279214	2135	0
a25g10	S001152258	Neisseria gonorrhoeae NCCP11945; CP001050	2644	0
a25g11	S001016338	Ochrobactrum sp. PED4-7; EU529846	2426	0
a25g12	S001016338	Ochrobactrum sp. PED4-7; EU529846	2381	0
a25h01	S000337826	uncultured Corynebacterium sp. MTcory16R; AF115941	2498	0
a25h03	S001792989	Propionibacterium acnes; JCM 6425; AB538431	2551	0
a25h04	S001016338	Ochrobactrum sp. PED4-7; EU529846	2373	0
a25h08	S001016338	Ochrobactrum sp. PED4-7; EU529846	2422	0
a25h10	S001792989	Propionibacterium acnes; JCM 6425; AB538431	2652	0
a25h11	S001600725	uncultured Achromobacter sp.; F7aug.25; GQ416598	2212	0
a25h12	S001572539	Janthinobacterium sp. Acj 103; AB480751	2658	0
a26a04	S001549312	Pseudomonas poae; LS172; FJ937922	2476	0
a26a05	S001199475	Pedobacter sp. b3N1b-b5; FJ377317	2258	0
a26a08	S000562039	uncultured alpha proteobacterium; APe2_70; AB074649	2307	0
a26a09	S000859963	Enterococcus gilvus; 2366; EF535229	2549	0
a26b01	S001016338	Ochrobactrum sp. PED4-7; EU529846	2438	0
a26b02	S000392974	Sphingomonas sp. G296-14; AF395037	2597	0
a26b03	S001016338	Ochrobactrum sp. PED4-7; EU529846	2595	0
a26b07	S001792989	Propionibacterium acnes; JCM 6425; AB538431	2700	0
a26b09	S001016338	Ochrobactrum sp. PED4-7; EU529846	2565	0
a26b10	S000887335	uncultured Yersinia sp.; ASP-5; EF679181	2595	0
a26b11	S001572969	Escherichia coli BL21(DE3); CP001665	2642	0
a26b12	S001792989	Propionibacterium acnes; JCM 6425; AB538431	2543	0
a26c01	S001016338	Ochrobactrum sp. PED4-7; EU529846	2502	0
a26c02	S001341132	uncultured marine bacterium; A6-3-69; FJ826377	2535	0
a26c03	S000399980	phenanthrene-degrading bacterium 90; AY177371	2298	0
a26c04	S001572961	Escherichia coli BL21(DE3); CP001665	2379	0
a26c05	S001016338	Ochrobactrum sp. PED4-7; EU529846	2466	0
a26c07	S001572564	Escherichia coli; Acj 212; AB480776	2623	0
a26c09	S001016338	Ochrobactrum sp. PED4-7; EU529846	2319	0
a26c11	S001336093	uncultured Pseudomonadales bacterium; 4-1_19; FJ517681	2488	0
a26c12	S001792989	Propionibacterium acnes; JCM 6425; AB538431	2652	0
a26d05	S000901667	Pseudomonas sp. MPU L18; AB334528	2264	0
a26d06	S001152258	Neisseria gonorrhoeae NCCP11945; CP001050	2682	0
a26d07	S001792989	Propionibacterium acnes; JCM 6425; AB538431	2595	0
a26d08	S001610969	Escherichia coli DH1; CP001637	2736	0
a26d10	S000399980	phenanthrene-degrading bacterium 90; AY177371	2456	0
a26d11	S001548776	Escherichia coli BW2952; K-12; CP001396	2664	0
a26d12	S001792989	Propionibacterium acnes; JCM 6425; AB538431	2597	0
a26e01	S000965282	Delftia acidovorans SPH-1; CP000884	2432	0
a26e02	S001792989	Propionibacterium acnes; JCM 6425; AB538431	2587	0
a26e03	S000965282	Delftia acidovorans SPH-1; CP000884	2559	0
a26e04	S001016338	Ochrobactrum sp. PED4-7; EU529846	2587	0
a26e05	S001874546	Hymenobacter sp. NMC04; GU321347	2298	0
a26e06	S000859963	Enterococcus gilvus; 2366; EF535229	2742	0
a26e08	S001792989	Propionibacterium acnes; JCM 6425; AB538431	2668	0
a26e10	S001016338	Ochrobactrum sp. PED4-7; EU529846	2603	0
a26e12	S001792989	Propionibacterium acnes; JCM 6425; AB538431	2700	0
a26f02	S001792989	Propionibacterium acnes; JCM 6425; AB538431	2650	0
a26f04	S001548776	Escherichia coli BW2952; K-12; CP001396	2640	0
a26f05	S001417947	Stenotrophomonas maltophilia; PSM-2; FJ906801	2524	0
a26f08	S001792989	Propionibacterium acnes; JCM 6425; AB538431	2591	0
a26f09	S001152258	Neisseria gonorrhoeae NCCP11945; CP001050	2377	0
a26f10	S001016338	Ochrobactrum sp. PED4-7; EU529846	2415	0
a26f11	S001792989	Propionibacterium acnes; JCM 6425; AB538431	2244	0
a26f12	S001874546	Hymenobacter sp. NMC04; GU321347	2288	0
a26g04	S000392952	blackwater bioreactor bacterium BW6; AF394171	2597	0
a26g06	S000337826	uncultured Corynebacterium sp. MTcory16R; AF115941	2569	0
a26g10	S001572539	Janthinobacterium sp. Acj 103; AB480751	2603	0
a26g11	S001341132	uncultured marine bacterium; A6-3-69; FJ826377	2599	0
a26h01	S001792989	Propionibacterium acnes; JCM 6425; AB538431	2650	0
a26h02	S001610969	Escherichia coli DH1; CP001637	2629	0
a27a01	S001792989	Propionibacterium acnes; JCM 6425; AB538431	2682	0
a27a02	S001417225	Staphylococcus epidermidis; MB; FJ768459	2603	0
a27a03	S001792989	Propionibacterium acnes; JCM 6425; AB538431	2621	0
a27a04	S000391477	Pseudomonas reactans; NCPPB 1311; AF320987	2345	0
a27a05	S001572539	Janthinobacterium sp. Acj 103; AB480751	2529	0
a27a11	S001572564	Escherichia coli; Acj 212; AB480776	2601	0
a27b01	S001417225	Staphylococcus epidermidis; MB; FJ768459	2738	0
a27b03	S001572539	Janthinobacterium sp. Acj 103; AB480751	2498	0
a27b04	S001792989	Propionibacterium acnes; JCM 6425; AB538431	2597	0
a27b05	S001548776	Escherichia coli BW2952; K-12; CP001396	2565	0
a27b08	S001792989	Propionibacterium acnes; JCM 6425; AB538431	2686	0
a27b10	S001016338	Ochrobactrum sp. PED4-7; EU529846	2407	0
a27c02	S001549312	Pseudomonas poae; LS172; FJ937922	2740	0
a27c03	S000887335	uncultured Yersinia sp.; ASP-5; EF679181	2385	0
a27c06	S001610969	Escherichia coli DH1; CP001637	2728	0
a27c07	S001572961	Escherichia coli BL21(DE3); CP001665	2361	0
a27c08	S000562039	uncultured alpha proteobacterium; APe2_70; AB074649	2458	0
a27c09	S001610969	Escherichia coli DH1; CP001637	2652	0
a27d02	S000744818	uncultured beta proteobacterium; XME18; EF061949	2639	0
a27d04	S000859963	Enterococcus gilvus; 2366; EF535229	2416	0
a27d06	S001572961	Escherichia coli BL21(DE3); CP001665	2654	0
a27d07	S000887335	uncultured Yersinia sp.; ASP-5; EF679181	2698	0
a27d08	S001075654	uncultured Shigella sp.; M7-22; EU530456	2422	0
a27d10	S001546250	uncultured Morganella sp.; VE7B12; GQ179707	2557	0
a27e02	S001792989	Propionibacterium acnes; JCM 6425; AB538431	2694	0
a27e04	S000562039	uncultured alpha proteobacterium; APe2_70; AB074649	2480	0
a27e06	S001572564	Escherichia coli; Acj 212; AB480776	2726	0
a27e07	S001792989	Propionibacterium acnes; JCM 6425; AB538431	2686	0
a27e08	S000926008	Serratia proteamaculans 568; CP000826	2589	0
a27e10	S001792989	Propionibacterium acnes; JCM 6425; AB538431	2694	0
a27e11	S001792989	Propionibacterium acnes; JCM 6425; AB538431	2551	0
a27f01	S001792989	Propionibacterium acnes; JCM 6425; AB538431	2672	0
a27f02	S001152258	Neisseria gonorrhoeae NCCP11945; CP001050	2674	0
a27f04	S001016338	Ochrobactrum sp. PED4-7; EU529846	2397	0
a27f06	S001546250	uncultured Morganella sp.; VE7B12; GQ179707	2183	0
a27f09	S001016338	Ochrobactrum sp. PED4-7; EU529846	2407	0
a27f10	S001152258	Neisseria gonorrhoeae NCCP11945; CP001050	2567	0
a27g02	S001016338	Ochrobactrum sp. PED4-7; EU529846	2458	0
a27g03	S001546250	uncultured Morganella sp.; VE7B12; GQ179707	2413	0
a27g04	S000981292	Pseudomonas fluorescens; 2312; EU360313	2543	0
a27g10	S000392952	blackwater bioreactor bacterium BW6; AF394171	2510	0
a27g11	S000701293	Pedobacter rhizospharae; type strain: 01-96; AM279214	2341	0
a27g12	S001792989	Propionibacterium acnes; JCM 6425; AB538431	2704	0
a27h01	S001152258	Neisseria gonorrhoeae NCCP11945; CP001050	2652	0
a27h02	S001418810	Staphylococcus epidermidis; ES-305-8; FN393805	2591	0
a27h03	S000965282	Delftia acidovorans SPH-1; CP000884	2623	0
a27h04	S001572969	Escherichia coli BL21(DE3); CP001665	2492	0
a27h06	S000744818	uncultured beta proteobacterium; XME18; EF061949	2625	0
a27h07	S000979619	Yersinia intermedia; CCUG 11292; EF179123	2476	0
a27h09	S000133722	Enterobacter asburiae; MY2; AJ506159	2533	0
a27h11	S001016338	Ochrobactrum sp. PED4-7; EU529846	2478	0
a28a02	S001152258	Neisseria gonorrhoeae NCCP11945; CP001050	2571	0
a28a05	S001016338	Ochrobactrum sp. PED4-7; EU529846	2284	0
a28a10	S001792989	Propionibacterium acnes; JCM 6425; AB538431	2520	0
a28a11	S001792989	Propionibacterium acnes; JCM 6425; AB538431	2611	0
a28a12	S001572834	Escherichia coli O157:H7 str. TW14359; CP001368	2264	0
a28b01	S000392974	Sphingomonas sp. G296-14; AF395037	2206	0
a28b04	S001152258	Neisseria gonorrhoeae NCCP11945; CP001050	2633	0
a28b07	S001572969	Escherichia coli BL21(DE3); CP001665	2577	0
a28b08	S001044265	Escherichia coli str. K12 substr. DH10B; K-12; CP000948	2702	0
a28b10	S000392952	blackwater bioreactor bacterium BW6; AF394171	2642	0
a28b11	S001909596	Bacillus sp. oral taxon F28; VK010; GU431508	950	0
a28b12	S001016338	Ochrobactrum sp. PED4-7; EU529846	2357	0
a28c04	S001152295	Stenotrophomonas maltophilia R551-3; CP001111	2387	0
a28c07	S001199475	Pedobacter sp. b3N1b-b5; FJ377317	2010	0
a28c12	S000921352	uncultured Mycobacterium sp.; EHFS1_S04a; EU071480	2456	0
a28d02	S001320472	Paenibacillus sp. enrichment culture clone 15A4; NCAAH	1461	0
a28d04	S001792989	Propionibacterium acnes; JCM 6425; AB538431	2664	0
a28d05	S001016338	Ochrobactrum sp. PED4-7; EU529846	2361	0
a28d06	S000728641	Pseudomonas trivialis; BIHB 749; DQ885949	2692	0
a28d07	S001610969	Escherichia coli DH1; CP001637	2595	0
a28d09	S000965282	Delftia acidovorans SPH-1; CP000884	2424	0
a28d11	S001016338	Ochrobactrum sp. PED4-7; EU529846	2359	0
a28e08	S001610969	Escherichia coli DH1; CP001637	2442	0
a28e10	S001794709	Bacillus megaterium; SB 3112; GU191918	2755	0
a28f01	S000562039	uncultured alpha proteobacterium; APe2_70; AB074649	2006	0
a28f02	S001792989	Propionibacterium acnes; JCM 6425; AB538431	2385	0
a28f07	S001178835	uncultured Stenotrophomonas sp.; GI6-10b-C05; FJ193149	2488	0
a28f11	S001909596	Bacillus sp. oral taxon F28; VK010; GU431508	837	0
a28f12	S001610969	Escherichia coli DH1; CP001637	2625	0
a28g01	S001546250	uncultured Morganella sp.; VE7B12; GQ179707	2609	0
a28g04	S000562039	uncultured alpha proteobacterium; APe2_70; AB074649	2315	0
a28g06	S001792989	Propionibacterium acnes; JCM 6425; AB538431	2365	0
a28g08	S000392974	Sphingomonas sp. G296-14; AF395037	2377	0
a28g10	S000399980	phenanthrene-degrading bacterium 90; AY177371	2448	0
a28g12	S001016338	Ochrobactrum sp. PED4-7; EU529846	2335	0
a28h01	S001792989	Propionibacterium acnes; JCM 6425; AB538431	2591	0
a28h02	S001016338	Ochrobactrum sp. PED4-7; EU529846	2415	0
a28h03	S001572539	Janthinobacterium sp. Acj 103; AB480751	2619	0
a28h04	S001792989	Propionibacterium acnes; JCM 6425; AB538431	2635	0
a28h05	S001152258	Neisseria gonorrhoeae NCCP11945; CP001050	2694	0
a28h06	S001792989	Propionibacterium acnes; JCM 6425; AB538431	2531	0
a28h08	S001610969	Escherichia coli DH1; CP001637	2305	0
a28h09	S000979619	Yersinia intermedia; CCUG 11292; EF179123	2391	0
a28h10	S001792989	Propionibacterium acnes; JCM 6425; AB538431	2615	0
a28h11	S000887335	uncultured Yersinia sp.; ASP-5; EF679181	2587	0
a28h12	S001549312	Pseudomonas poae; LS172; FJ937922	2555	0
a85a05	S000750307	Prevotella timonensis (T); 4401737; DQ518919	2664	0
a85b03	S000944666	uncultured Streptococcus sp.; 601H03(oral); AM420228	2639	0
a85b05	S001589410	Anaerococcus tetradius; F0127; GQ422749	2329	0
a85c11	S001088822	uncultured Sneathia sp.; 230; EU644479	2676	0
a85c12	S001088824	uncultured Sneathia sp.; 301; EU644481	2668	0
a85d07	S001550489	Bacteroides ureolyticus; R-37890; FN401327	2670	0
a85d08	S000944666	uncultured Streptococcus sp.; 601H03(oral); AM420228	2662	0
a85f01	S000944666	uncultured Streptococcus sp.; 601H03(oral); AM420228	2621	0
a85g12	S001589410	Anaerococcus tetradius; F0127; GQ422749	2345	0
a86g10	S001088824	uncultured Sneathia sp.; 301; EU644481	2692	0
a86g11	S001088824	uncultured Sneathia sp.; 301; EU644481	2652	0
a87b08	S001088824	uncultured Sneathia sp.; 301; EU644481	2603	0
a87d08	S001589404	Veillonella sp. oral taxon 780; F0009; GQ422743	2734	0
a87e12	S000944666	uncultured Streptococcus sp.; 601H03(oral); AM420228	2662	0
a85a03	S001546273	uncultured Sneathia sp.; VE12E10; GQ179730	2347	0
a85a06	S001546273	uncultured Sneathia sp.; VE12E10; GQ179730	2527	0
a85a10	S001088824	uncultured Sneathia sp.; 301; EU644481	2637	0
a85a11	S001589410	Anaerococcus tetradius; F0127; GQ422749	2284	0
a85a12	S001088824	uncultured Sneathia sp.; 301; EU644481	2599	0
a85b01	S001589410	Anaerococcus tetradius; F0127; GQ422749	2264	0
a85b04	S001589410	Anaerococcus tetradius; F0127; GQ422749	2216	0
a85b06	S001088822	uncultured Sneathia sp.; 230; EU644479	2684	0
a85b08	S001589410	Anaerococcus tetradius; F0127; GQ422749	2302	0
a85b09	S001088822	uncultured Sneathia sp.; 230; EU644479	2668	0
a85b10	S000750307	Prevotella timonensis (T); 4401737; DQ518919	2666	0
a85b11	S001088824	uncultured Sneathia sp.; 301; EU644481	2625	0
a85c02	S000944666	uncultured Streptococcus sp.; 601H03(oral); AM420228	2670	0
a85c04	S001088824	uncultured Sneathia sp.; 301; EU644481	2642	0
a85d03	S001546274	uncultured Aerococcus sp.; VE4G11; GQ179731	2670	0
a85d04	S000395210	Streptococcus sp. NJ9704; AF479579	2609	0
a85d06	S001088822	uncultured Sneathia sp.; 230; EU644479	2668	0
a85d09	S001088822	uncultured Sneathia sp.; 230; EU644479	2561	0
a85d12	S001088824	uncultured Sneathia sp.; 301; EU644481	2684	0
a85e02	S000944666	uncultured Streptococcus sp.; 601H03(oral); AM420228	2605	0
a85e03	S001546274	uncultured Aerococcus sp.; VE4G11; GQ179731	2676	0
a85e05	S001589410	Anaerococcus tetradius; F0127; GQ422749	2196	0
a85e06	S001088824	uncultured Sneathia sp.; 301; EU644481	2664	0
a85e07	S001088824	uncultured Sneathia sp.; 301; EU644481	2561	0
a85e08	S001088824	uncultured Sneathia sp.; 301; EU644481	2603	0
a85e10	S001088824	uncultured Sneathia sp.; 301; EU644481	2676	0
a85e11	S000944666	uncultured Streptococcus sp.; 601H03(oral); AM420228	2678	0
a85f02	S001088824	uncultured Sneathia sp.; 301; EU644481	2684	0
a85f03	S001550489	Bacteroides ureolyticus; R-37890; FN401327	2597	0
[truncated: 2,607 more rows]
